# Supplementary material for: Diarylmaleic anhydrides: unusual organic luminescence, multi-stimuli response and photochromism
Source: Royal Society of Chemistry journal article supplement (doi:10.1039/c6tc05519b), 2017-01-01
Supplement: c6tc05519b1.pdf [file c6tc05519b1.pdf]

Electronic supplementary information

**Diarylmaleic anhydrides: unusual organic luminescence, multi-stimuli response and photochromism**

Xiaofei Mei<sup>a</sup>, Jingwei Wang<sup>b</sup>, Zhonggao Zhou<sup>a</sup>, Shiyi Wu<sup>b</sup>, Limei Huang<sup>a</sup>, Zhenghuan Lin<sup>b,\*</sup> and Qidan Ling<sup>a,b,\*</sup>

<sup>a</sup> College of Chemistry and Chemical Engineering, Fujian Normal University, Fuzhou 350007, Fujian, China.

<sup>b</sup> Fujian Key Laboratory of Polymer Materials, College of Materials Science and Engineering, Fujian Normal University, Fuzhou 350007, Fujian, China.

\*E-mail: zhlin@fjnu.edu.cn; qdling@fjnu.edu.cn

# Contents

## 1. Supplemental Schemes, figures and tables

**Scheme S1** Synthetic routes of diarylmaleic anhydrides.

**Fig. S1** Absorption and emission spectra of diarylmaleic anhydrides in DCM and in solid.

**Table S1** Calculated data for absorption of BPMA, BTMA and BIMA.

**Fig. S2** Solvent effect on the absorption and emission spectra of BPMA.

**Fig. S3** Solvent effect on the absorption and emission spectra of BTMA.

**Fig. S4** Solvent effect on the absorption and emission spectra of BIMA.

**Table S2** Photophysical properties of diarylmaleic anhydrides in different solutions.

**Figure S5.** Orbital plots of BPMA-M, BPMA-OM and BIMA-M.

**Table S3** Calculated data for absorption of BPMA-M, BPMA-OM and BIMA-M.

**Fig. S6** Solvent effect on the absorption (a) and emission (b) spectra of BPMA-M.

**Fig. S7** Solvent effect on the absorption (a) and emission (b) spectra of BPMA-OM.

**Fig. S8** Solvent effect on the absorption (a) and emission (b) spectra of BIMA-M.

**Table S4** Photophysical properties of diarylmaleic anhydrides in different solutions

**Fig. S9** Repeated switching between green and brown emission.

**Fig. S10** PXRD pattern of BTMA in pristine, ground, fumed and heated powder.

**Fig. S11** Absorption spectra of BPMA in various solvents under different irradiation time.

**Scheme S2** Reaction route of the photo cyclization of BPMA.

**Fig. S12** <sup>1</sup>HNMR of the crude product of photo-cyclization of BPMA.

**Fig. S13** MALDI-TOF mass spectra of the crude product of photo-cyclization of BPMA..

**Fig. S14** Structure of BPMA-D and BPMA-C, and their planar conformation.

**Table S5** Calculated absorption parameters for BPMA-D and BPMA-C.

**Fig. S15** Photochromic process of BPMA in CF under 365 nm UV light.

**Fig. S16** Absorption spectra of BPMA in halogenated solvents under irradiation for 30s.

**Fig. S17** Absorption spectra of BPMA in DCM under irradiation of 254 nm UV light.

**Fig. S18** Absorption spectra of BPMA in toluene/DCM solvent under 365 nm UV light..

**Fig. S19** Absorption of BPMA in hexane without and with 120 s of irradiation at 365 nm.

## 2. Experimental Section

## 3. Structural Characterizations

## 4. References

## 1. Supplemental Schemes, figures and tables

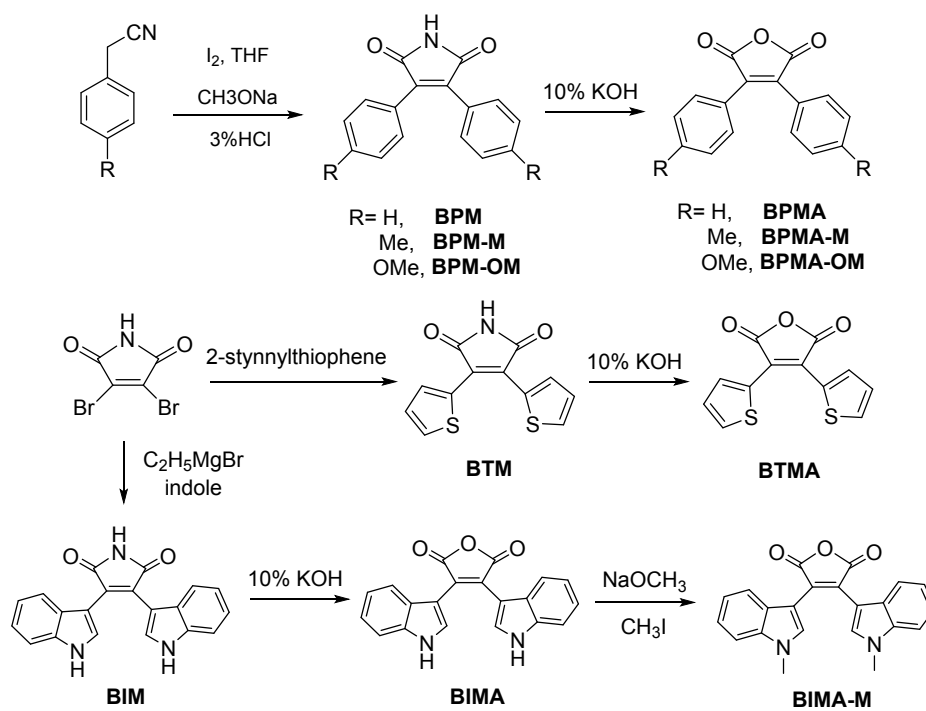

**Scheme S1** Synthetic routes of diarylmaleic anhydrides.

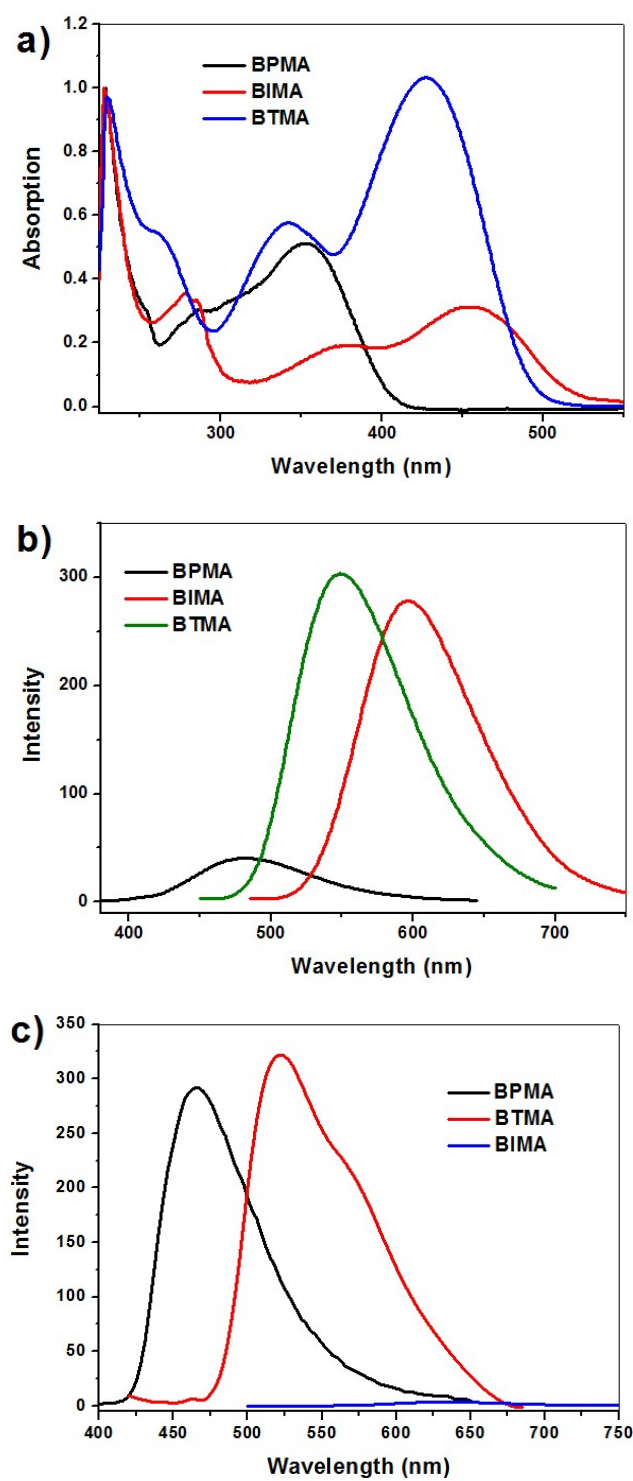

**Fig. S1** Absorption (a) and emission (b) spectra of BPMA, BIMA, and BTMA in DCM solution. Emission spectra (c) of BPMA, BIMA, and BTMA in solid

**Table S1** Calculated wavelength ( $\lambda$ ) and oscillator strength ( $f$ ) for absorption of BPMA, BTMA and BIMA.

| Compounds   |                       | Main orbital transition (CIC) <sup>a</sup>                            | $\lambda$ , nm <sup>b</sup> | $f$ <sup>c</sup> |
|-------------|-----------------------|-----------------------------------------------------------------------|-----------------------------|------------------|
| <b>BPMA</b> | $S_0 \rightarrow S_1$ | HOMO $\rightarrow$ LUMO (0.66)                                        | 393                         | 0.2081           |
|             | $S_0 \rightarrow S_2$ | HOMO-4 $\rightarrow$ LUMO (-0.40)<br>HOMO-1 $\rightarrow$ LUMO (0.56) | 359                         | 0.0267           |
|             | $S_0 \rightarrow S_3$ | HOMO-4 $\rightarrow$ LUMO (0.57)<br>HOMO-1 $\rightarrow$ LUMO (0.41)  | 338                         | 0.0143           |
| <b>BTMA</b> | $S_0 \rightarrow S_1$ | HOMO $\rightarrow$ LUMO (0.71)                                        | 460                         | 0.3046           |
|             | $S_0 \rightarrow S_2$ | HOMO-4 $\rightarrow$ LUMO (0.28)<br>HOMO-1 $\rightarrow$ LUMO (0.65)  | 367                         | 0.0148           |
|             | $S_0 \rightarrow S_3$ | HOMO-3 $\rightarrow$ LUMO (0.28)<br>HOMO-2 $\rightarrow$ LUMO (0.64)  | 349                         | 0.0003           |
| <b>BIMA</b> | $S_0 \rightarrow S_1$ | HOMO $\rightarrow$ LUMO (0.70)                                        | 478                         | 0.2043           |
|             | $S_0 \rightarrow S_2$ | HOMO-2 $\rightarrow$ LUMO (-0.16)<br>HOMO-1 $\rightarrow$ LUMO (0.68) | 400                         | 0.0798           |
|             | $S_0 \rightarrow S_3$ | HOMO-2 $\rightarrow$ LUMO (0.69)                                      | 379                         | 0.0211           |

<sup>a</sup> CI expansion coefficients for the main orbital transitions. <sup>b</sup> Wavelength. <sup>c</sup> Oscillator strength.

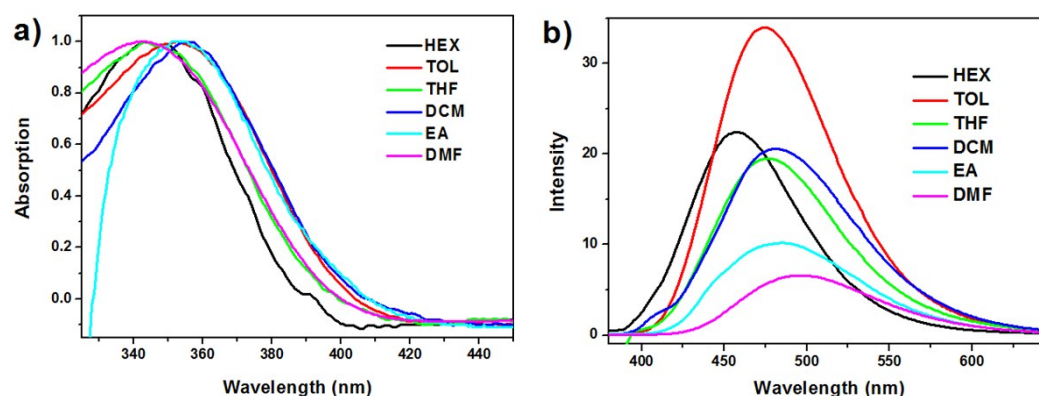

**Fig. S2** Solvent effect on the absorption (a) and emission (b) spectra of BPMA: hexane (HEX), toluene (TOL), tetrahydrofuran (THF), dichloromethane (DCM), ethyl acetate (EA) and dimethyl formamide (DMF).

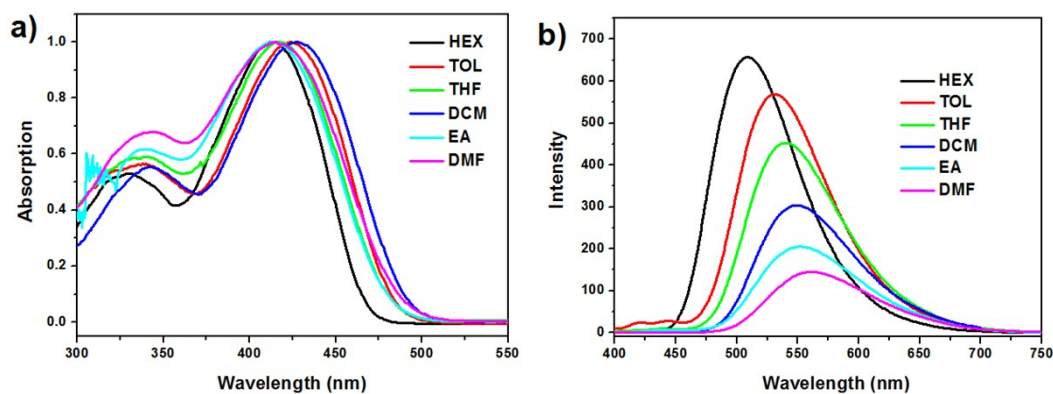

**Fig. S3** Solvent effect on the absorption (a) and emission (b) spectra of BTMA: hexane (HEX), toluene (TOL), tetrahydrofuran (THF), dichloromethane (DCM), ethyl acetate (EA) and dimethyl formamide (DMF).

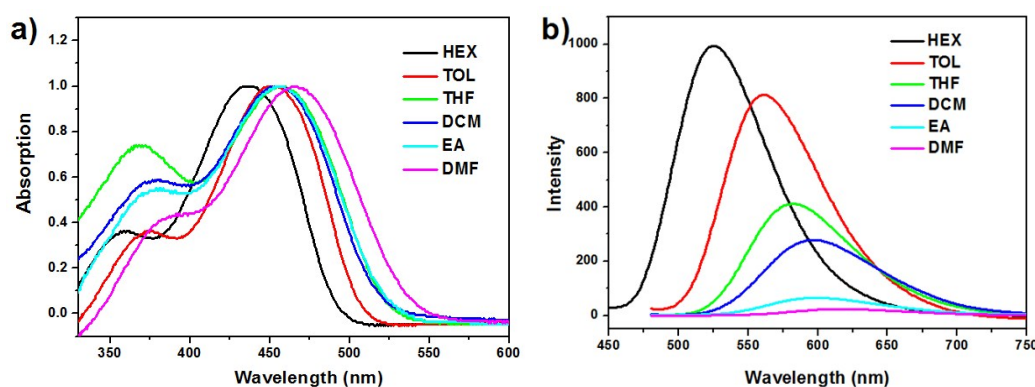

**Fig. S4** Solvent effect on the absorption (a) and emission (b) spectra of BIMA: hexane (HEX), toluene (TOL), tetrahydrofuran (THF), dichloromethane (DCM), ethyl acetate (EA) and dimethyl formamide (DMF).

**Table S2** Experimental data of photophysical properties of diarylmaleic anhydrides in different solutions

| Compound    | Solvent | $\lambda_{\text{abs}}$<br>(nm) | $\lambda_{\text{em}}$<br>(nm) | Stokes shift<br>(nm) | $\Phi_{\text{F}}(\%)$ |
|-------------|---------|--------------------------------|-------------------------------|----------------------|-----------------------|
| <b>BPMA</b> | HEX     | 344                            | 457                           | 113                  | 2.5                   |
|             | TOL     | 352                            | 472                           | 120                  | 3                     |
|             | THF     | 343                            | 474                           | 131                  | 2.3                   |
|             | DCM     | 356                            | 479                           | 123                  | 2                     |
|             | EA      | 355                            | 484                           | 129                  | 1.5                   |
|             | DMF     | 343                            | 498                           | 155                  | <0.1                  |
| <b>BTMA</b> | HEX     | 413                            | 509                           | 96                   | 98                    |
|             | TOL     | 423                            | 531                           | 108                  | 82                    |
|             | THF     | 418                            | 540                           | 122                  | 71                    |
|             | DCM     | 428                            | 549                           | 121                  | 59                    |
|             | EA      | 414                            | 552                           | 138                  | 48                    |
|             | DMF     | 415                            | 561                           | 146                  | 40                    |
| <b>BIMA</b> | HEX     | 434                            | 525                           | 91                   | 80                    |
|             | TOL     | 448                            | 561                           | 113                  | 75                    |
|             | THF     | 452                            | 582                           | 130                  | 58                    |
|             | DCM     | 456                            | 597                           | 141                  | 46                    |
|             | EA      | 457                            | 599                           | 142                  | 15                    |
|             | DMF     | 436                            | 617                           | 181                  | 8                     |

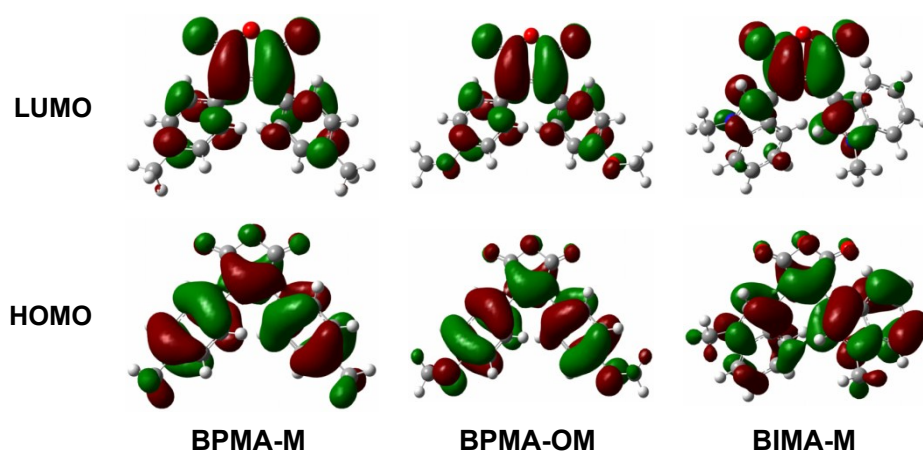

**Figure S5.** Orbital plots of BPMA-M, BPMA-OM and BIMA-M in the optimized structure.



**Table S3** Calculated wavelength ( $\lambda$ ) and oscillator strength ( $f$ ) for absorption of BPMA-M, BPMA-OM and BIMA-M.

| Compounds      |                       | Main orbital transition (CIC) <sup>a</sup>                            | $\lambda$ , nm <sup>b</sup> | $f$ <sup>c</sup> |
|----------------|-----------------------|-----------------------------------------------------------------------|-----------------------------|------------------|
| <b>BPMA-M</b>  | $S_0 \rightarrow S_1$ | HOMO $\rightarrow$ LUMO (0.70)                                        | 411                         | 0.2617           |
|                | $S_0 \rightarrow S_2$ | HOMO-4 $\rightarrow$ LUMO (0.40)<br>HOMO-1 $\rightarrow$ LUMO (0.57)  | 359                         | 0.0153           |
|                | $S_0 \rightarrow S_3$ | HOMO-4 $\rightarrow$ LUMO (0.57)<br>HOMO-1 $\rightarrow$ LUMO (-0.40) | 337                         | 0.0093           |
| <b>BPMA-OM</b> | $S_0 \rightarrow S_1$ | HOMO $\rightarrow$ LUMO (0.70)                                        | 450                         | 0.3155           |
|                | $S_0 \rightarrow S_2$ | HOMO-1 $\rightarrow$ LUMO (0.70)                                      | 361                         | 0.1086           |
|                | $S_0 \rightarrow S_3$ | HOMO-4 $\rightarrow$ LUMO (0.51)<br>HOMO-2 $\rightarrow$ LUMO (-0.47) | 350                         | 0.0023           |
| <b>BIMA-M</b>  | $S_0 \rightarrow S_1$ | HOMO $\rightarrow$ LUMO (0.70)                                        | 490                         | 0.2337           |
|                | $S_0 \rightarrow S_2$ | HOMO-2 $\rightarrow$ LUMO (-0.17)<br>HOMO-1 $\rightarrow$ LUMO (0.67) | 400                         | 0.0833           |
|                | $S_0 \rightarrow S_3$ | HOMO-2 $\rightarrow$ LUMO (0.68)<br>HOMO-1 $\rightarrow$ LUMO (0.17)  | 378                         | 0.0235           |

<sup>a</sup> CI expansion coefficients for the main orbital transitions. <sup>b</sup> Wavelength. <sup>c</sup> Oscillator strength.

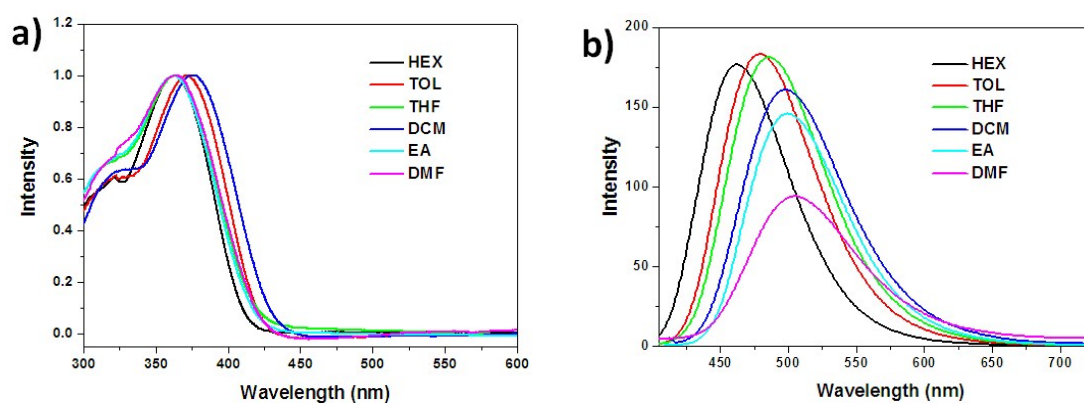

**Fig. S6** Solvent effect on the absorption (a) and emission (b) spectra of BPMA-M: hexane (HEX), toluene (TOL), tetrahydrofuran (THF), dichloromethane (DCM), ethyl acetate (EA) and dimethyl formamide (DMF).

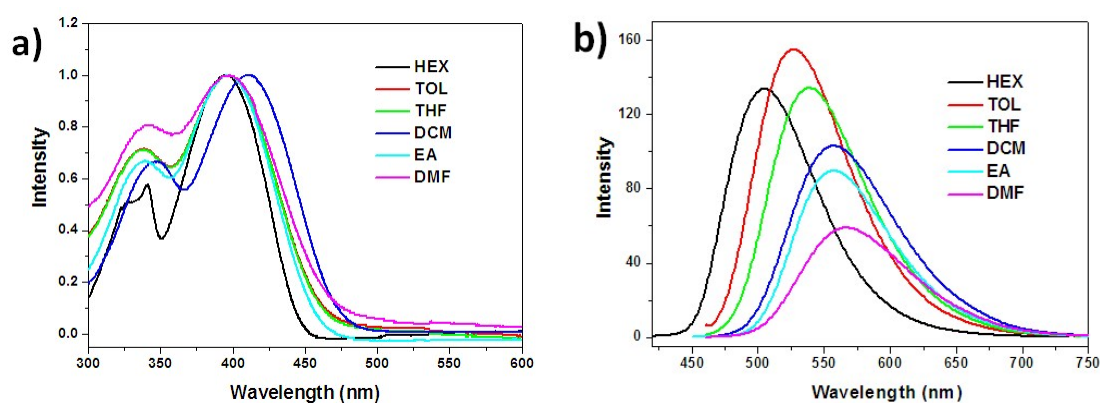

**Fig. S7** Solvent effect on the absorption (a) and emission (b) spectra of BPMA-OM: hexane (HEX), toluene (TOL), tetrahydrofuran (THF), dichloromethane (DCM), ethyl acetate (EA) and dimethyl formamide (DMF).

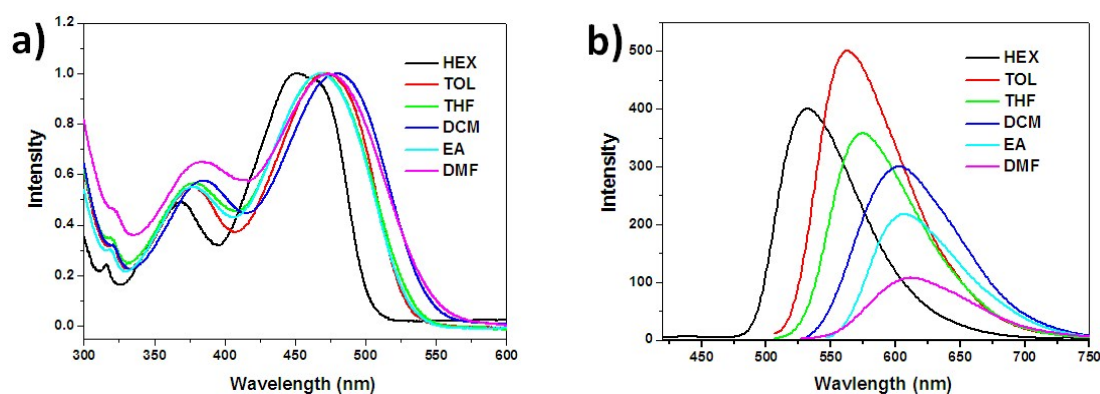

**Fig. S8** Solvent effect on the absorption (a) and emission (b) spectra of BIMA-M: hexane (HEX), toluene (TOL), tetrahydrofuran (THF), dichloromethane (DCM), ethyl acetate (EA) and dimethyl formamide (DMF).

**Table S4** Experimental data of photophysical properties of diarylmaleic anhydrides in different solutions

| Compound       | Solvent | $\lambda_{\text{abs}}$<br>(nm) | $\lambda_{\text{em}}$<br>(nm) | Stokes shift<br>(nm) | $\Phi_{\text{F}}(\%)$ |
|----------------|---------|--------------------------------|-------------------------------|----------------------|-----------------------|
| <b>BPMA-M</b>  | HEX     | 363                            | 457                           | 94                   | 53                    |
|                | TOL     | 369                            | 472                           | 103                  | 72                    |
|                | THF     | 361                            | 474                           | 113                  | 68                    |
|                | DCM     | 374                            | 498                           | 105                  | 48                    |
|                | EA      | 362                            | 484                           | 122                  | 42                    |
|                | DMF     | 361                            | 498                           | 137                  | 30                    |
| <b>BPMA-OM</b> | HEX     | 393                            | 502                           | 109                  | 80                    |
|                | TOL     | 394                            | 526                           | 132                  | 98                    |
|                | THF     | 391                            | 538                           | 147                  | 71                    |
|                | DCM     | 409                            | 556                           | 157                  | 67                    |
|                | EA      | 396                            | 558                           | 162                  | 48                    |
|                | DMF     | 395                            | 567                           | 172                  | 38                    |
| <b>BIMA-M</b>  | HEX     | 454                            | 530                           | 76                   | 76                    |
|                | TOL     | 470                            | 562                           | 92                   | 82                    |
|                | THF     | 468                            | 573                           | 105                  | 52                    |
|                | DCM     | 481                            | 602                           | 121                  | 42                    |
|                | EA      | 467                            | 606                           | 139                  | 36                    |
|                | DMF     | 465                            | 614                           | 149                  | 27                    |

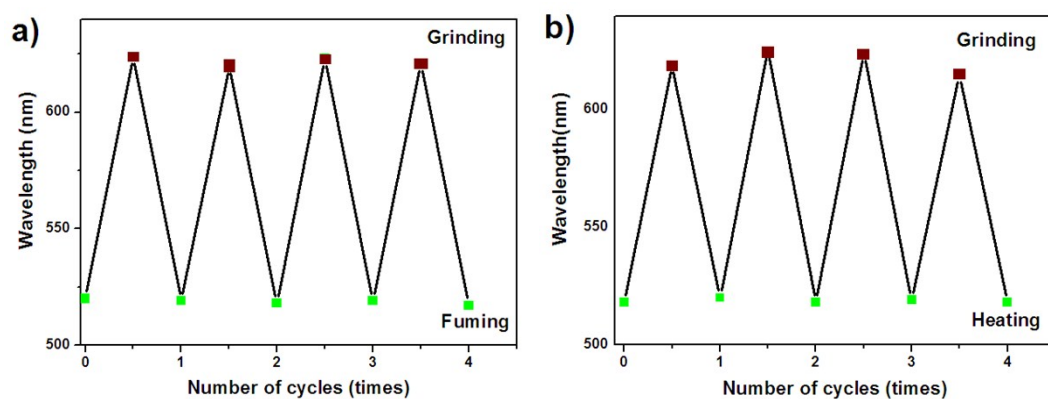

**Fig. S9** Repeated switching between green and brown emission by fuming-grinding cycles (a) and heating-grinding cycles (b).

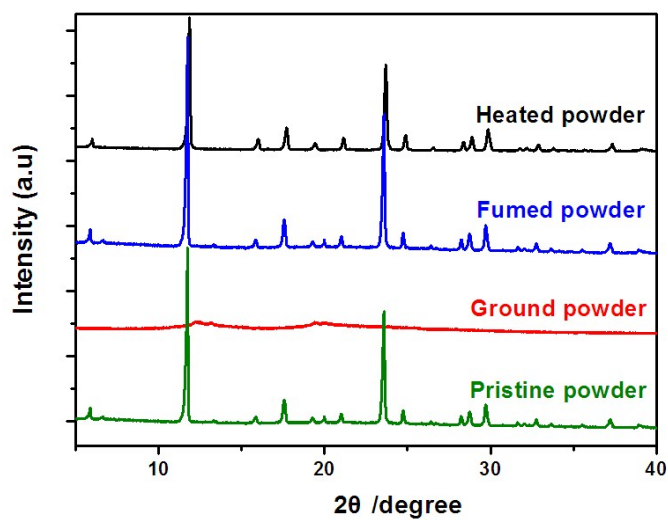

**Fig. S10** The PXRD pattern of BTMA in pristine, ground, fumed and heated powder.

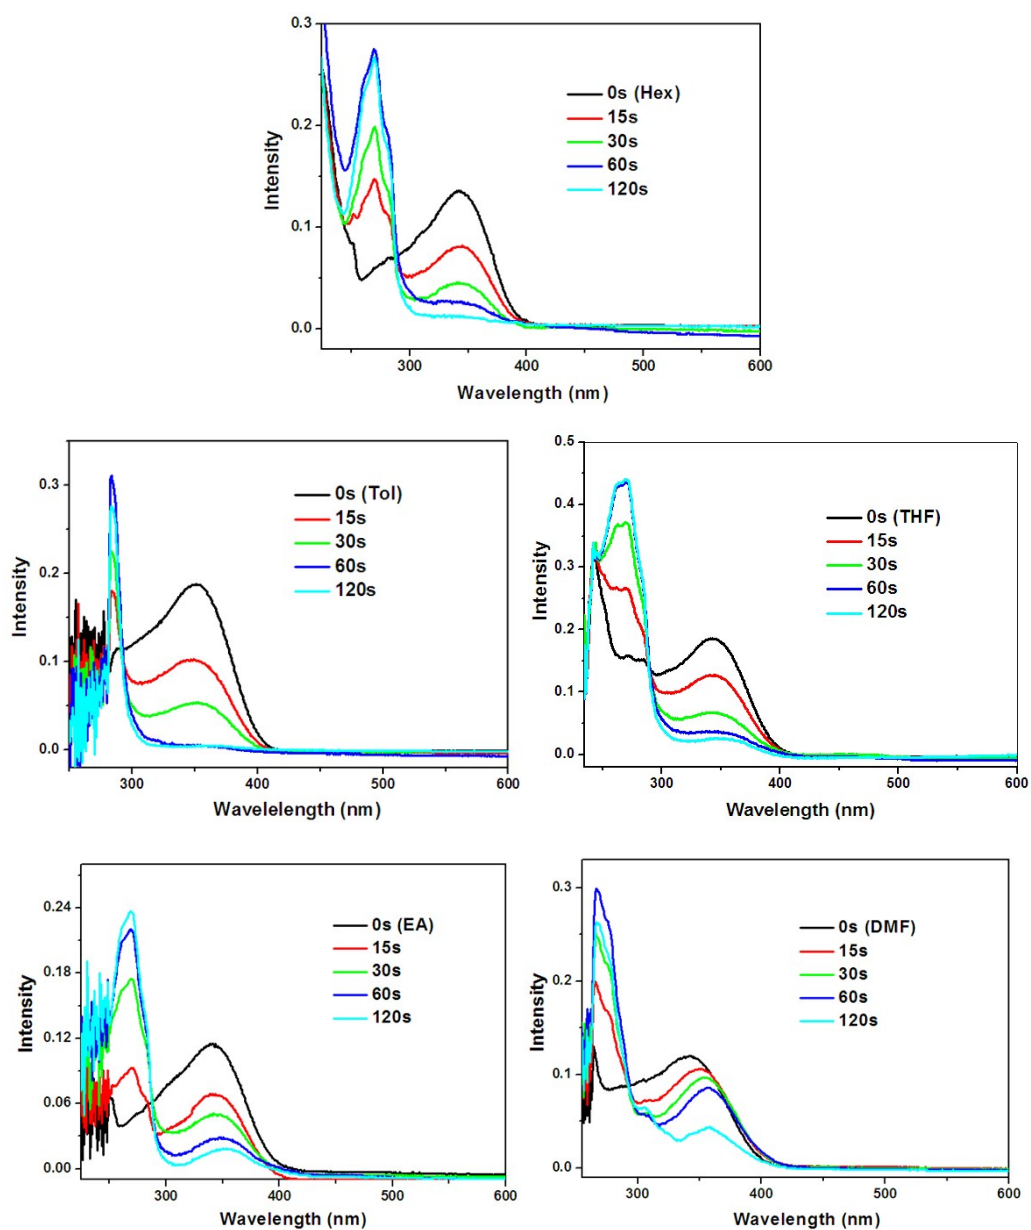

**Fig. S11** Absorption spectra of BPMA in hexane (Hex), toluene (Tol), THF, ethyl acetate (EA) and DMF solvents under different irradiation time (365 nm).

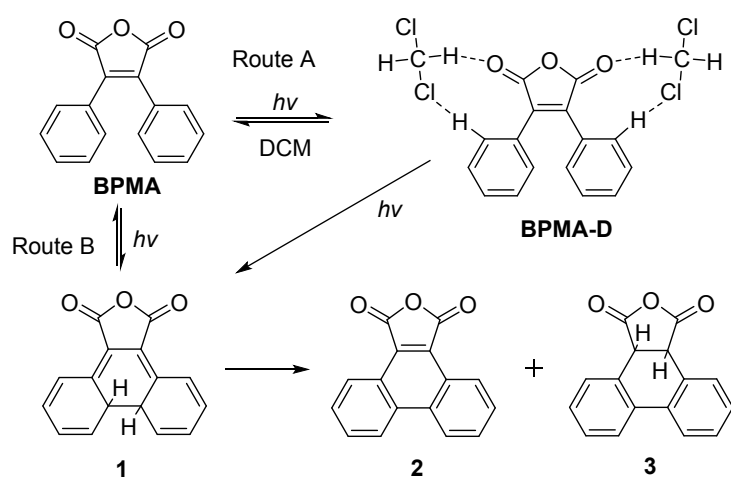

**Scheme S2** Reaction route of the photo cyclization of BPMA.

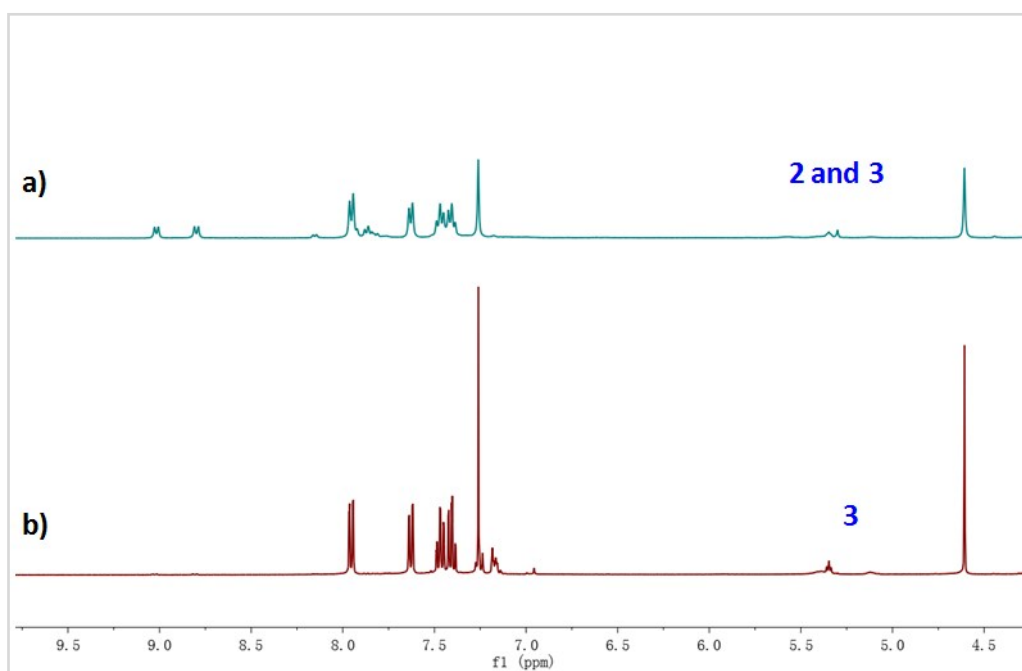

**Fig. S12** <sup>1</sup>H NMR of the crude product of BPMA under the irradiation of 365 nm UV light for 4 h in the presence (a) and absence (b) of oxygen.

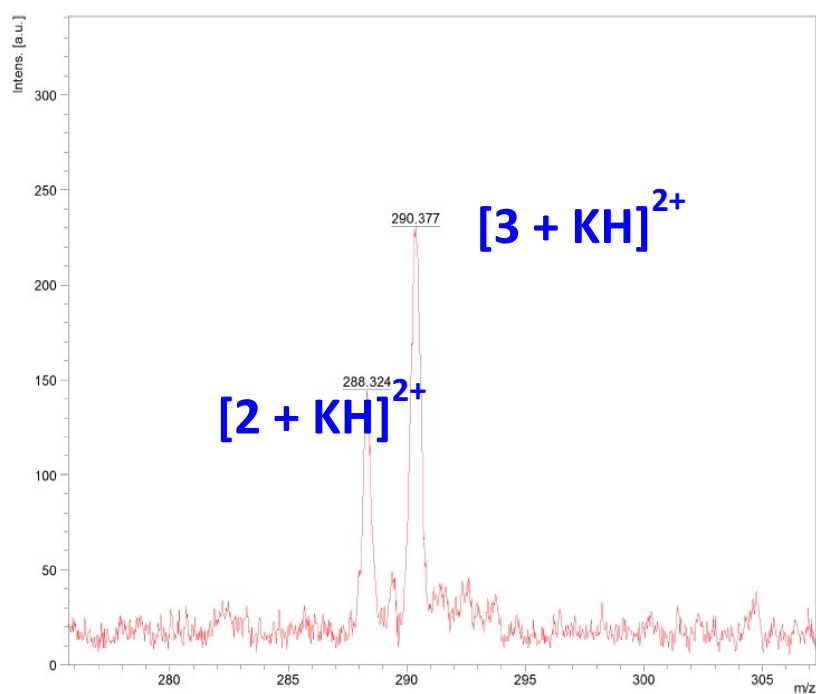

**Fig. S13** MALDI-TOF mass spectra of the crude product of BPMA under the irradiation of 365 nm UV light for 4 h in the presence of oxygen.

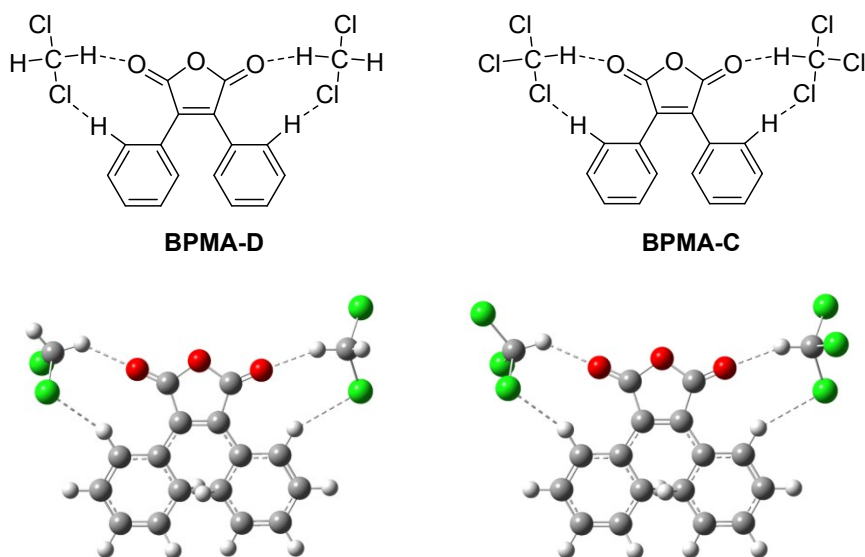

**Fig. S14** Structure of the intermediates BPMA-D and BPMA-C, and their planar conformation.

**Table S5** Calculated absorption parameters for planar BPMA-D and BPMA-C.

|                          |                          | Main orbital transition <sup>a</sup> (CIC)                            | $\lambda$ (nm) <sup>b</sup> | f <sup>c</sup> |
|--------------------------|--------------------------|-----------------------------------------------------------------------|-----------------------------|----------------|
| <b>Planar<br/>BPMA-D</b> | $S_0 \rightarrow S_2$    | HOMO $\rightarrow$ LUMO+1 (0.34)<br>HOMO $\rightarrow$ LUMO+2 (0.54)  | 504.8                       | 0.0274         |
|                          | $S_0 \rightarrow S_3$    | HOMO $\rightarrow$ LUMO+1 (0.58)<br>HOMO $\rightarrow$ LUMO+2 (-0.37) | 501.4                       | 0.0659         |
|                          | $S_0 \rightarrow S_5$    | HOMO-1 $\rightarrow$ LUMO (0.39)<br>HOMO $\rightarrow$ LUMO+6 (0.53)  | 399.8                       | 0.0598         |
|                          | $S_0 \rightarrow S_{10}$ | HOMO-1 $\rightarrow$ LUMO (-0.34)<br>HOMO $\rightarrow$ LUMO+6 (0.43) | 331.2                       | 0.5109         |
| <b>Planar<br/>BPMA-C</b> | $S_0 \rightarrow S_2$    | HOMO $\rightarrow$ LUMO+1 (0.35)<br>HOMO $\rightarrow$ LUMO+2 (0.54)  | 507.9                       | 0.0272         |
|                          | $S_0 \rightarrow S_3$    | HOMO $\rightarrow$ LUMO+1 (0.58)<br>HOMO $\rightarrow$ LUMO+2 (-0.38) | 502.8                       | 0.0659         |
|                          | $S_0 \rightarrow S_7$    | HOMO-1 $\rightarrow$ LUMO (0.38)<br>HOMO $\rightarrow$ LUMO+6 (0.53)  | 399.7                       | 0.0656         |
|                          | $S_0 \rightarrow S_{10}$ | HOMO-1 $\rightarrow$ LUMO (-0.33)<br>HOMO $\rightarrow$ LUMO+6 (0.44) | 332.0                       | 0.5120         |

<sup>a</sup> CI expansion coefficients for the main orbital transitions. <sup>b</sup> Wavelength. <sup>c</sup> Oscillator strength.



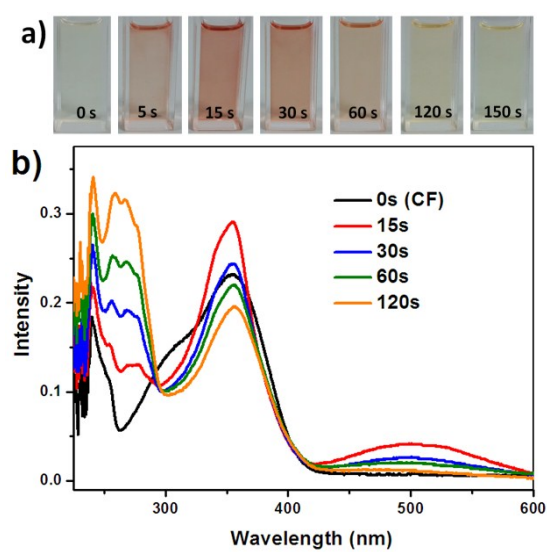

**Fig. S15** Photochromic process of BPMA in CF under 365 nm UV light: a) photochromic phenomenon under irradiation for 0~150 s; b) Absorption spectra under different irradiation time.

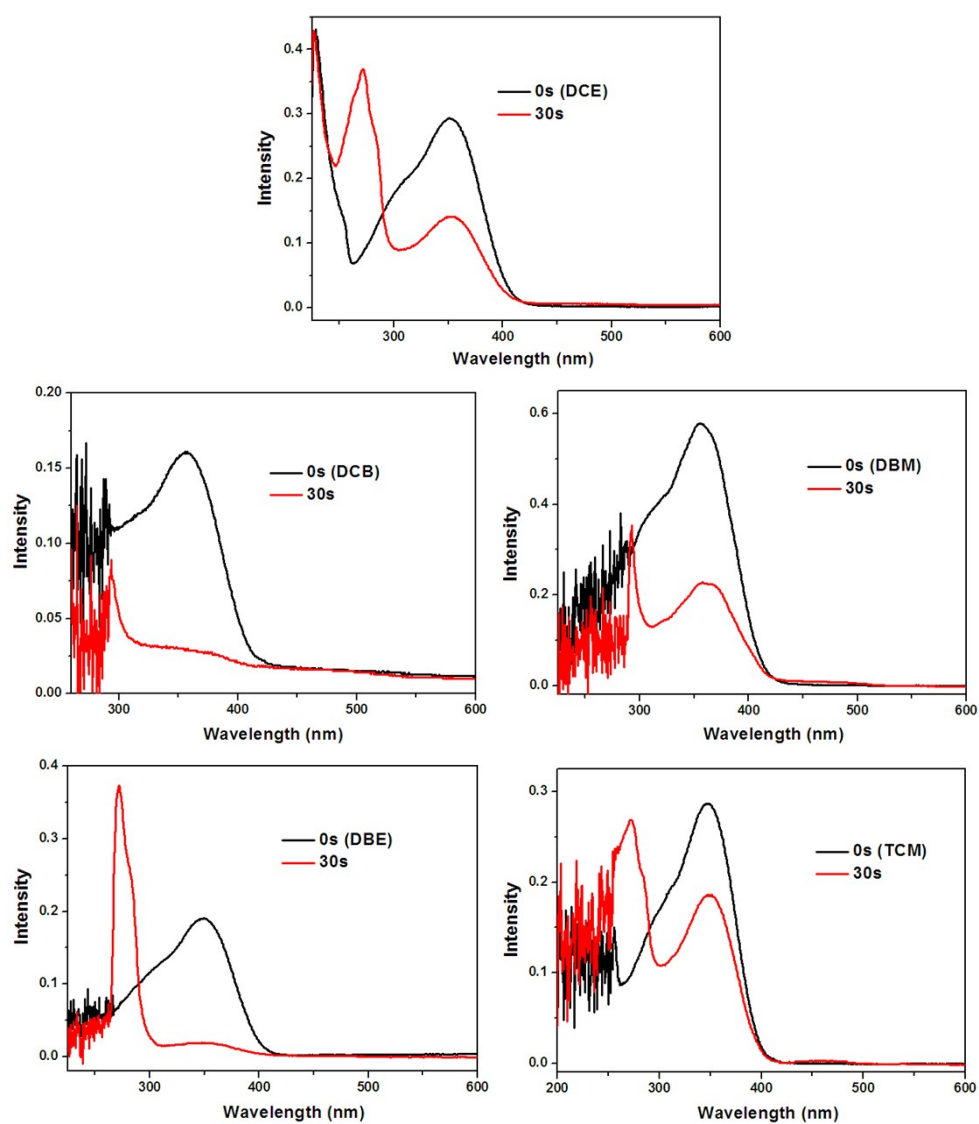

**Fig. S16** Absorption spectra of BPMA in 1,2-dichloroethane (DCE), *o*-dichlorobenzene (DCB), dibromomethane (DBM), 1,2-dibromoethane (DBE) and tetrachloromethane (TCM) solvents under irradiation for 30s.

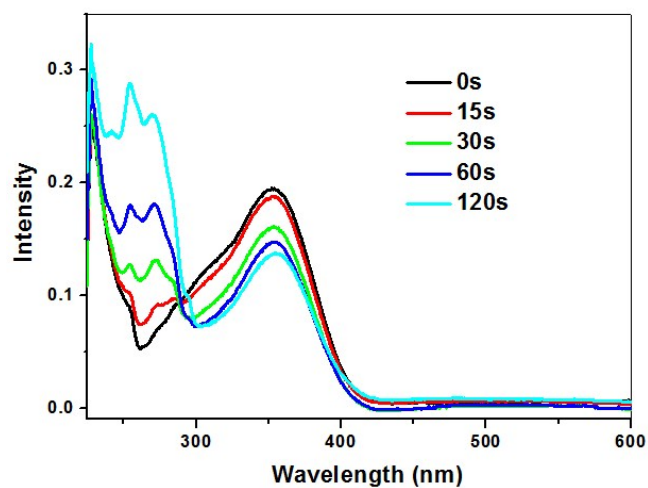

**Fig. S17** Absorption spectra of BPMA in DCM solvent under irradiation of 254 nm UV light.

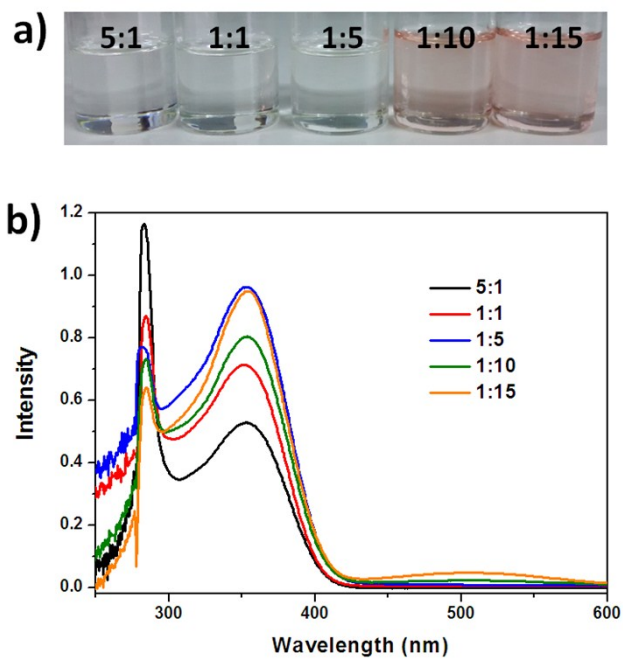

**Fig. S18** Absorption spectra of BPMA in toluene/DCM ( $V_{\text{tol}}/V_{\text{DCM}}=5:1, 1:1, 1:5, 1:10$  and  $1:15$ ) solvent under irradiation of 365 nm UV light.

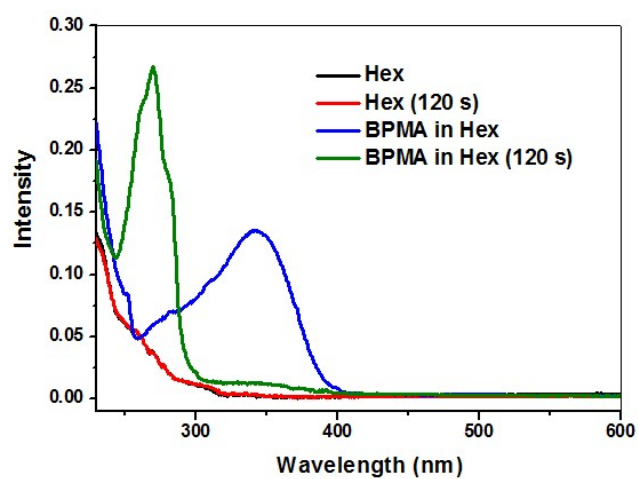

**Fig. S19** Absorption of BPMA in hexane without and with 120 s of irradiation at 365 nm.

## 2. Experimental Section

### General methods

High resolution ESI mass spectra were recorded on Bruker micrOTOF II spectrometer or a TSQ Quantum Access MAX of Thermo Fisher Scientific. MALDI-TOF mass spectra were recorded on a Bruker microflex LRF spectrometer. NMR spectra were measured in CDCl<sub>3</sub> or d-DMSO on a Bruker Ascend 400 FT-NMR spectrometer; <sup>1</sup>H and <sup>13</sup>C chemical shifts were quoted relative to the internal standard tetramethylsilane. UV-vis spectra were obtained on a Shimadzu UV-2600 spectrophotometer in the room temperature. The emission spectra were probed on a Shimadzu RF-5301PC fluorescence spectrophotometer. The thermal annealing processes were carried out in an oven. All photographs were recorded on a Canon Powershot G7 digital camera under UV light (365 nm). Powder X-ray diffraction (PXRD) data were collected using a PANalytical X-ray Diffractometer (X'Pert3 Powder) with Cu K $\alpha$  radiation. The fluorescence lifetime and absolute quantum yield ( $\Phi_F$ ) values of solution and solid were measured using an Edinburgh Instruments FLS920 Fluorescence Spectrometer with a 6-inch integrating sphere except the  $\Phi_F$  of BPMA in different solution determined against anthracene as a reference.<sup>1</sup>

### X-ray crystallography

The single crystals of **BPMA**, **BIMA** and **BTMA** were mounted on a glass fiber for the X-ray diffraction analysis. Data sets were collected on an Agilent Technologies SuperNova Single Crystal Diffractometer equipped with graphite monochromatic Cu-K $\alpha$  radiation ( $\lambda = 1.54184$  Å). The single crystals were kept at 290.3 K during data collection. The structures were solved by SHELXS (direct methods) and refined by SHELXL (full matrix least-squares techniques) in the Olex2 package. All non-hydrogen atoms were refined anisotropically displacement parameters, and all hydrogen atoms in the ideal positions attached to their parent atoms. Crystallographic data for the structure of BPMA, BTMA and BIMA have been deposited in the Cambridge Crystallographic Data Centre as supplementary publication no. CCDC 1518041, 1518042 and 1518043, respectively.

### Molecular simulations

Molecular Simulations were performed on Gaussian 09 program.<sup>2</sup> Geometry at ground state was fully optimized by the density functional theory (DFT) method with the Becke three-parameter hybrid exchange and the Lee-Yang-Parr correlation function (B3LYP) and 6-31G\* basis set. The optical transitions were calculated by time-dependent density function (TD-DFT) theory with same function and basis set.

### Materials and syntheses

All of the used reagents and solvents were obtained from commercial suppliers and used without further purification unless otherwise noted. 3,4-Dibromomaleimide was synthesized according to a previously reported method.<sup>3</sup> Thin layer chromatography was performed on G254 plates of Qingdao

Haiyang Chemical. Column chromatography was performed on Sorbent Technologies brand silica gel (40–63 mm, Standard grade).

### Synthesis of BPMA, BPMA-M and BPMA-OM

An anhydrous THF (20 mL) solution of cyanide (6.8 mmol) and iodine (1.73 g, 6.8 mmol) was placed into -78 °C bath purged with N<sub>2</sub>. Then, to the solution were slowly added 20 mL CH<sub>3</sub>ONa solution (Na, 1 g, 43.7 mmol and methanol, 20 mL). The mixture was allowed to heat to ambient temperature and stirred for 10 h, then the mixture was neutralized by adding HCl solution (1 M) slowly. It was extracted for several times with dichloromethane and saturated NaCl aqueous solution, and then dried over anhydrous MgSO<sub>4</sub>. After the solvent was removed under reduced pressure, the crude product was purified by silica gel column chromatography with DCM as eluent to give the green BPM and BPM-M, and yellow BPM-OM in 65~85% of isolated yield.

To an aqueous solution (100 mL) of 10% KOH was added BPM, BPM-M and BPM-OM (1 mmol). The mixture was heated to reflux for 4 h and then neutralized by the addition of hydrochloric acid (10 N) until precipitates formed. It was filtered, and the filtrates were dried in vacuo. The product was purified by recrystallization from ethanol, affording pure solids in 80~90% yield.

**3,4-diphenylmaleic anhydride (BPMA).** Yield: 80%. <sup>1</sup>H NMR (400 MHz, CDCl<sub>3</sub>) δ 7.55 (d, J = 6.8 Hz, 4H), 7.47 (t, J = 7.6, 7.2 Hz, 2H), 7.41 (t, J = 7.6, 7.2 Hz, 4H). <sup>13</sup>C NMR (100 MHz, CDCl<sub>3</sub>) δ 164.83, 138.18, 131.17, 129.71, 128.95, 127.19. MS (ESI) m/z [M+H]<sup>+</sup> calcd 251.0708, found 251.0705.

**3,4-di(4-methylphenyl)maleic anhydride (BPMA-M).** Yield: 87%. <sup>1</sup>H NMR (400 MHz, CDCl<sub>3</sub>) δ 7.46 (d, J = 8.2 Hz, 4H), 7.20 (d, J = 8.0 Hz, 4H), 2.39 (s, 6H). <sup>13</sup>C NMR (100 MHz, CDCl<sub>3</sub>) δ 165.13, 141.66, 137.35, 129.63, 129.61, 124.57, 21.60. MS (ESI) m/z [M+Na]<sup>+</sup> calcd 301.0841, found 301.0824.

**3,4-di(4-methoxyphenyl)maleic anhydride (BPMA-OM).** Yield: 90%. <sup>1</sup>H NMR (400 MHz, CDCl<sub>3</sub>) δ 7.56 (d, J = 8.8 Hz, 4H), 6.91 (d, J = 8.8 Hz, 4H), 3.85 (s, 6H). <sup>13</sup>C NMR (100 MHz, CDCl<sub>3</sub>) δ 165.44, 161.69, 135.66, 131.44, 119.93, 114.43, 55.41. MS (ESI) m/z [M+H]<sup>+</sup> calcd 310.0841, found 310.0834.

### Synthesis of 3,4-di(thiophen-2-yl)maleic anhydride (BTMA)

In 100 mL flask, 3,4-dibromomaleimide (1 g, 4 mmol), 2-tributylstannylthiophene (2.6 ml, 8.2 mmol), bis(triphenylphosphine)palladium(II) dichloride (0.14 g, 0.2 mmol) and anhydrous DMF (30 ml) were added. Then, the reaction mixture was heated to 90 °C for 10 h. The reaction mixture was cooled to room temperature and most of the solvent was evaporated. After purification by silica gel column chromatography employing DCM/hexane (1:1) as eluent, the yellow compound BTM (0.92g) was acquired in 90% total yield. <sup>1</sup>H NMR (400 MHz, *d*-DMSO): δ 7.21 (t, J = 4 Hz, 2H), 7.72 (d, J = 4 Hz, 2H), 7.88 (d, J = 6 Hz, 2H), 11.37 (s, 1H).

To an aqueous solution (100 mL) of 10% KOH was added BTM (0.26 g, 1 mmol). The mixture was heated to reflux for 4 h and then neutralized by the addition of hydrochloric acid (10 N) until precipitates formed. It was filtered, and the filtrates were dried in vacuo. The product was purified by silica gel column chromatography with DCM/PE (1:2) as eluent, affording green solids of BTMA (0.23 g) in 88 % yield. <sup>1</sup>H NMR (400 MHz, CDCl<sub>3</sub>) δ 7.99 (d, *J* = 2.8 Hz, 2H), 7.69 (dd, *J* = 4 Hz, 2H), 7.21 (dd, *J* = 4, 4.8 Hz, 2H). <sup>13</sup>C NMR (100 MHz, CDCl<sub>3</sub>) δ 164.31, 132.84, 132.39, 128.82, 128.46, 128.07. MS (ESI) *m/z* [M+H]<sup>+</sup> calcd 262.9837, found 262.9832.

#### Synthesis of 3,4-di (indol-3-yl)maleimide (BIMA)

Mg (1.68 g, 0.07 mmol) was purged with N<sub>2</sub> before adding anhydrous THF (20 mL) in 500 mL flask. To a solution of Mg was added C<sub>2</sub>H<sub>5</sub>Br (5.2 ml, 0.07 mmol) slowly. The mixture was heated to 40 °C. After 1 h, a solution of indole (7.8 g, 0.067 mol) in toluene was added to the flask. The mixture was heated to 60 °C. After 1 h, a solution of 3,4-dibromomaleimide (3 g, 0.01 mol) in 150 mL toluene was added to the flask slowly. Then, the reaction mixture was heated to 120 °C for 8 h. It was allowed to cool to ambient temperature and was filtered. The product was purified by silica gel column chromatography with EA/PE (1:4) as the eluant, affording dark red solids **BIM** (4.9 g) in 78 % yield.

To an aqueous solution (100 mL) of 10% KOH was added BIM (0.33 g, 1 mmol). The mixture was heated to reflux for 4 h and then neutralized by the addition of hydrochloric acid (10 N) until precipitates formed. It was filtered, and the filtrates were dried in vacuo. The product was purified by recrystallization from acetone, affording red-bulk solids (0.27 g) in 82 % yield. <sup>1</sup>H NMR (400 MHz, *d*-DMSO) δ 11.91 (s, 2H), 7.84 (s, 2H), 7.40 (d, *J* = 8.1 Hz, 2H), 7.02 (t, *J* = 7.2, 4.0 Hz, 2H), 6.83 (d, *J* = 8.0 Hz, 2H), 6.69 (t, *J* = 7.6 Hz, 7.2 Hz 2H). <sup>13</sup>C NMR (100 MHz, CDCl<sub>3</sub>) δ 166.67, 135.85, 129.49, 128.57, 125.07, 123.24, 122.07, 121.01, 111.47, 106.64. MS (ESI) *m/z* [M+H]<sup>+</sup> calcd 329.0926, found 329.0916.

#### Synthesis of 3,4-di(N-methyl-indol-3-yl)maleic anhydride(BIMA-M)

In 50 mL round bottom flask, a mixture of BIMA (0.33 g, 1 mmol), potassium tert-butoxide (0.47 g, 4.2 mmol), and anhydrous DMF (15 mL) was added and stirred for 1 h at 0 °C, then methyl iodide (0.57 g, 4 mmol) was added quickly into the mixture. After stirring for 10 h, the mixture was poured into water. It was extracted for several times with dichloromethane, and then dried over anhydrous MgSO<sub>4</sub>. After the solvent was removed under reduced pressure, the crude product was purified by silica gel column chromatography with DCM/PE (1:3) as eluent to give the yellow product in 78 % yield. <sup>1</sup>H NMR (400 MHz, CDCl<sub>3</sub>) δ 7.77 (s, 2H), 7.32 (d, *J* = 8.1 Hz, 2H), 7.14 (t, *J* = 8, 8 Hz, 2H), 6.91 (d, *J* = 7.9 Hz, 2H), 6.77 (t, *J* = 8.1, 8 Hz, 2H), 3.87 (s, 6H). <sup>13</sup>C NMR (100 MHz, CDCl<sub>3</sub>) δ 167.02, 136.92, 133.78, 127.31, 125.97, 122.71, 122.40, 120.57, 109.65, 105.23, 33.50. MS (ESI) *m/z* [M]<sup>+</sup> calcd 356.1161, found 356.1166.

### 3. Structural Characterizations

**Table S6** Crystal data and structure refinement for **BPMA**, **BTMA** and **BIMA**.

| Crystal                                  | <b>BPMA</b>                                    | <b>BTMA</b>                                                  | <b>BIMA</b>                                                   |
|------------------------------------------|------------------------------------------------|--------------------------------------------------------------|---------------------------------------------------------------|
| Formula                                  | C <sub>16</sub> H <sub>10</sub> O <sub>3</sub> | C <sub>12</sub> H <sub>6</sub> O <sub>3</sub> S <sub>2</sub> | C <sub>20</sub> H <sub>12</sub> N <sub>2</sub> O <sub>3</sub> |
| Formula weight                           | 250.24                                         | 262.31                                                       | 328.32                                                        |
| Crystal system                           | Monoclinic                                     | Monoclinic                                                   | Monoclinic                                                    |
| Space group                              | P 1 21/c 1                                     | P 1 21/c 1                                                   | P 1 c 1                                                       |
| a (Å)                                    | 15.2208(4)                                     | 15.1632(4)                                                   | 7.2537(3)                                                     |
| b (Å)                                    | 5.94826(19)                                    | 5.75337(13)                                                  | 6.7653(3)                                                     |
| c (Å)                                    | 13.8485(4)                                     | 12.5157(3)                                                   | 15.6473(7)                                                    |
| α(deg)                                   | 90.00                                          | 90.00                                                        | 90.00                                                         |
| β(deg)                                   | 101.601(3)                                     | 95.460(2)                                                    | 97.694(4)                                                     |
| γ(deg)                                   | 90.00                                          | 90.00                                                        | 90.00                                                         |
| V (Å <sup>3</sup> )                      | 1228.19(6)                                     | 1086.91(4)                                                   | 760.95(6)                                                     |
| Z                                        | 4                                              | 4                                                            | 2                                                             |
| D <sub>calcd.</sub> (g/cm <sup>3</sup> ) | 1.353                                          | 1.6029                                                       | 1.433                                                         |
| F(000)                                   | 520.0                                          | 540.2109                                                     | 340.0                                                         |
| R (int)                                  | 0.0154                                         | 0.0687                                                       | 0.0415                                                        |
| GOF on F <sup>2</sup>                    | 1.102                                          | 1.0495                                                       | 1.061                                                         |
| R1[I > 2σ(I)]                            | 0.0505                                         | 0.0599                                                       | 0.0580                                                        |
| wR2[I>2σ(I)]                             | 0.1179                                         | 0.1599                                                       | 0.1556                                                        |
| R1 (all data)                            | 0.0595                                         | 0.0667                                                       | 0.0608                                                        |
| wR2(all data)                            | 0.1278                                         | 0.1721                                                       | 0.1598                                                        |



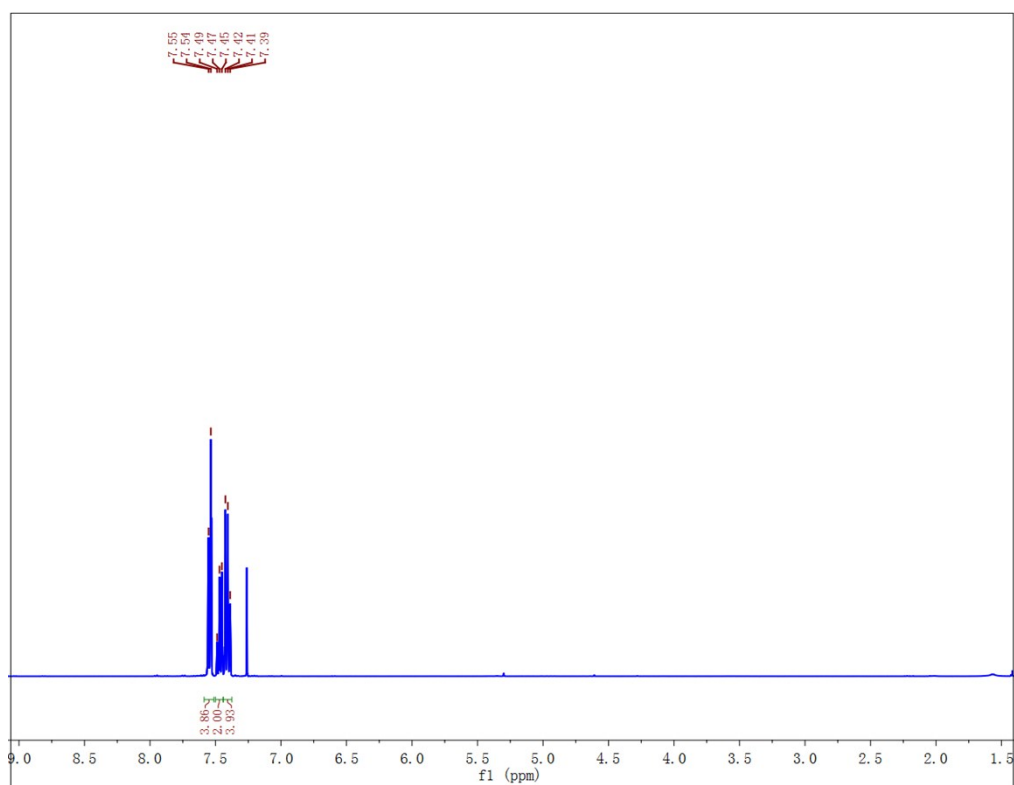

**Fig. S20** <sup>1</sup>H NMR of BPMA in *d*-CDCl<sub>3</sub>.

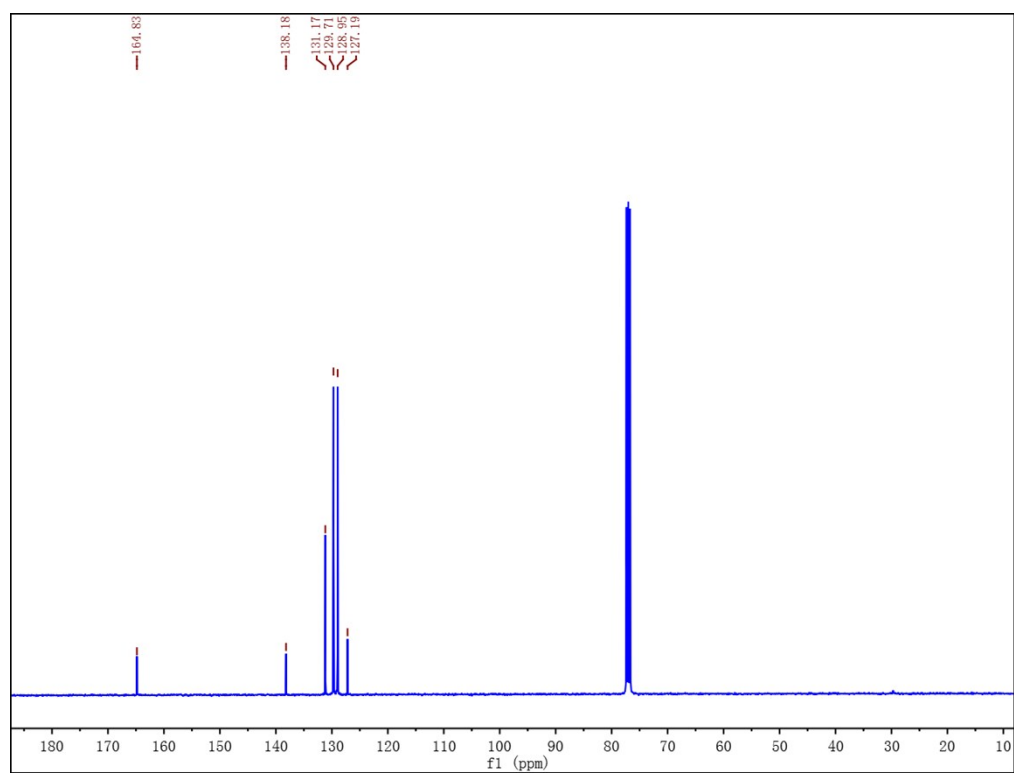

**Fig. S21** <sup>13</sup>C NMR of BPMA in *d*-CDCl<sub>3</sub>.

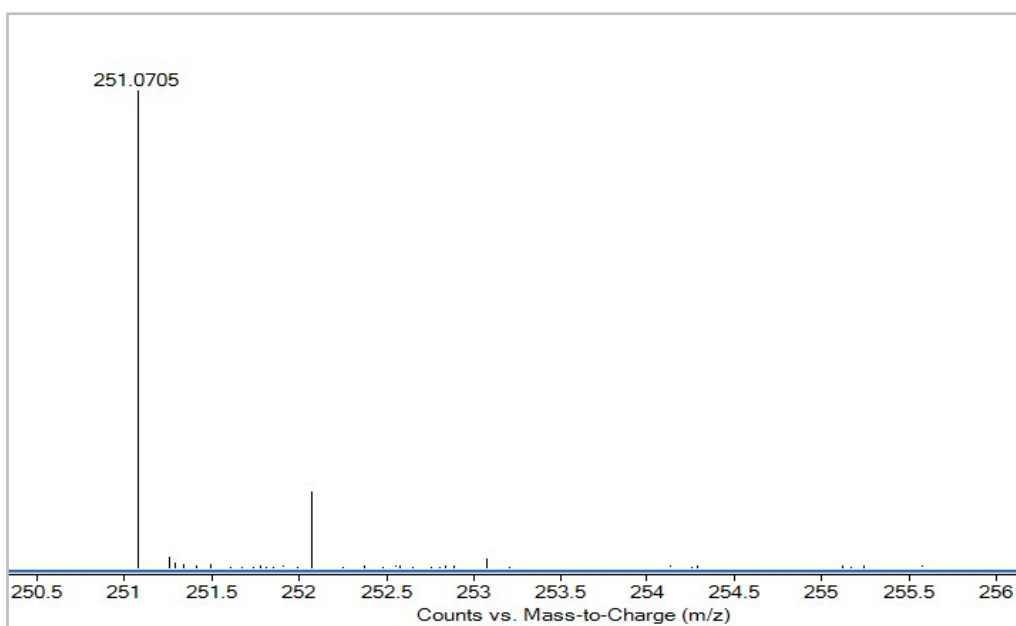

**Fig. S22** High-resolution Mass of BPMA.

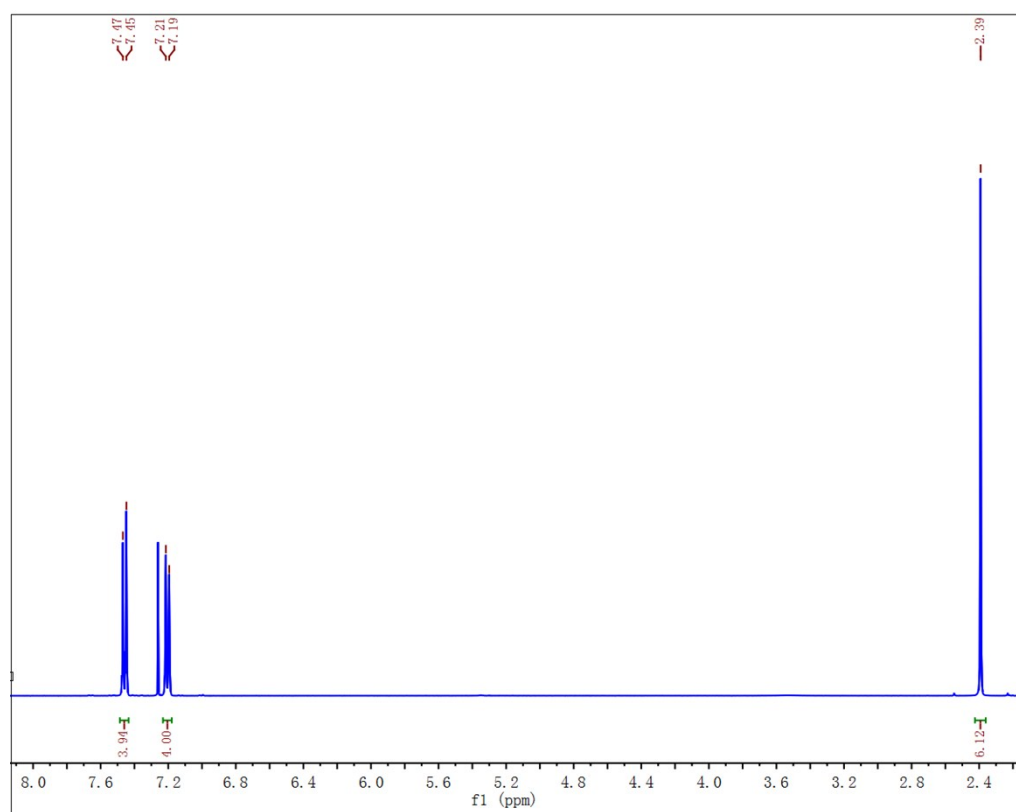

**Fig. S23**  $^1\text{H}$  NMR of BPMA-M in  $d\text{-CDCl}_3$ .

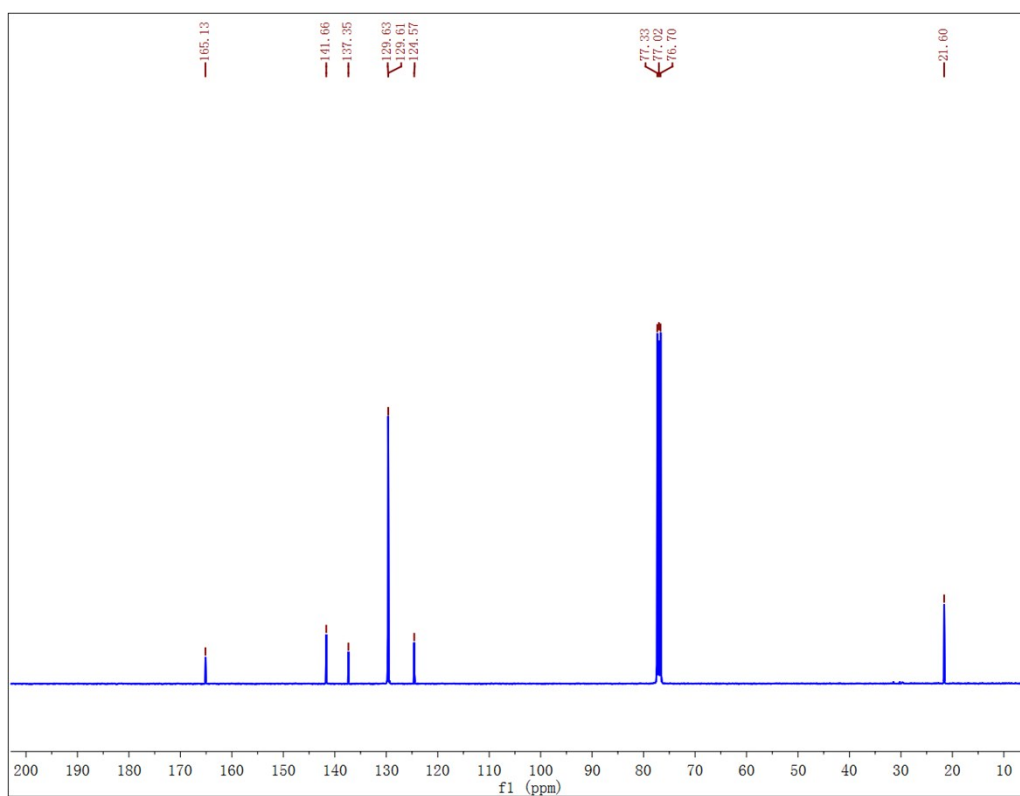

**Fig. S24**  $^{13}\text{C}$  NMR of BPMA-M in  $d\text{-CDCl}_3$

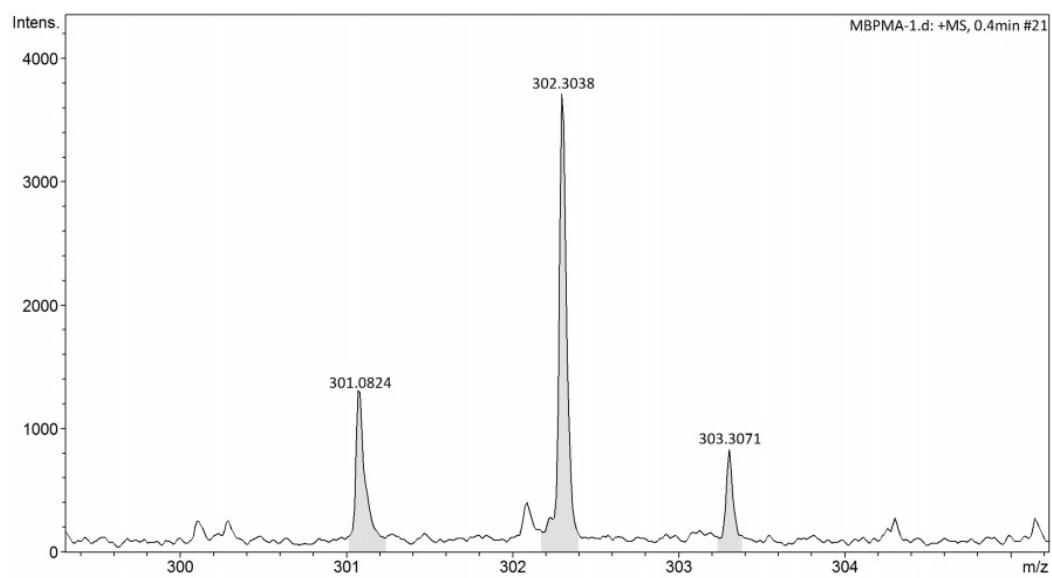

**Fig. S25** High-resolution Mass of BPMA-M.

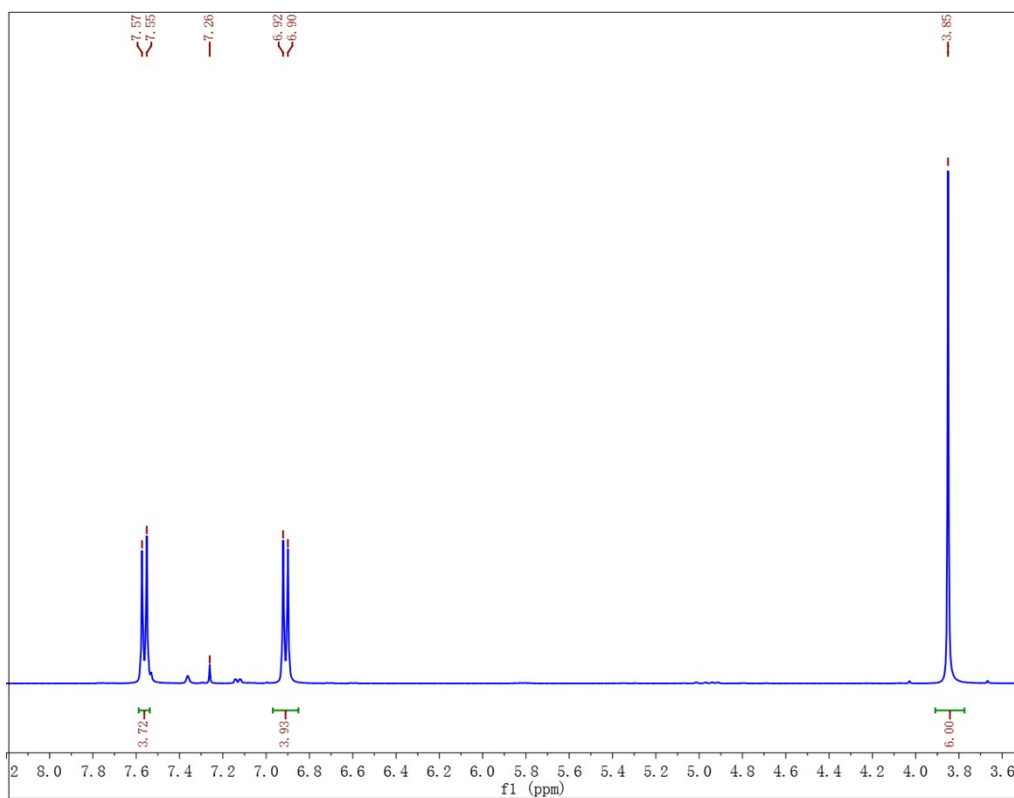

**Fig. S26** <sup>1</sup>H NMR of BPMA-OM in *d*-CDCl<sub>3</sub>.

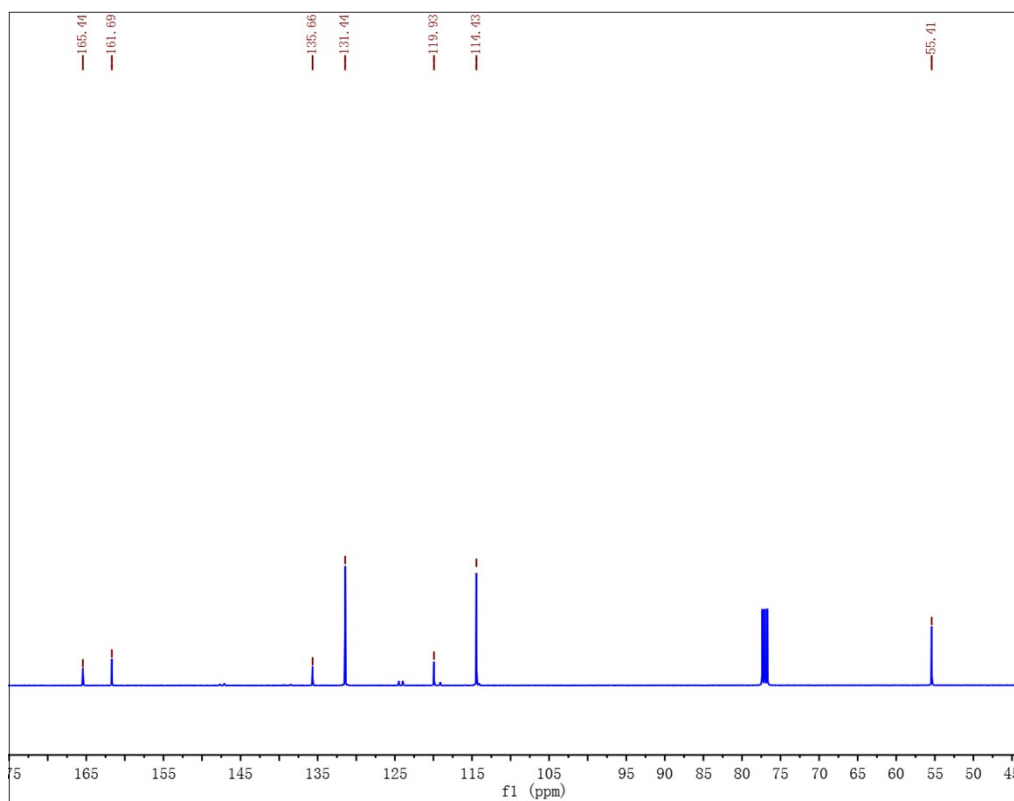

**Fig. S27** <sup>13</sup>C NMR of BPMA-OM in *d*-CDCl<sub>3</sub>.

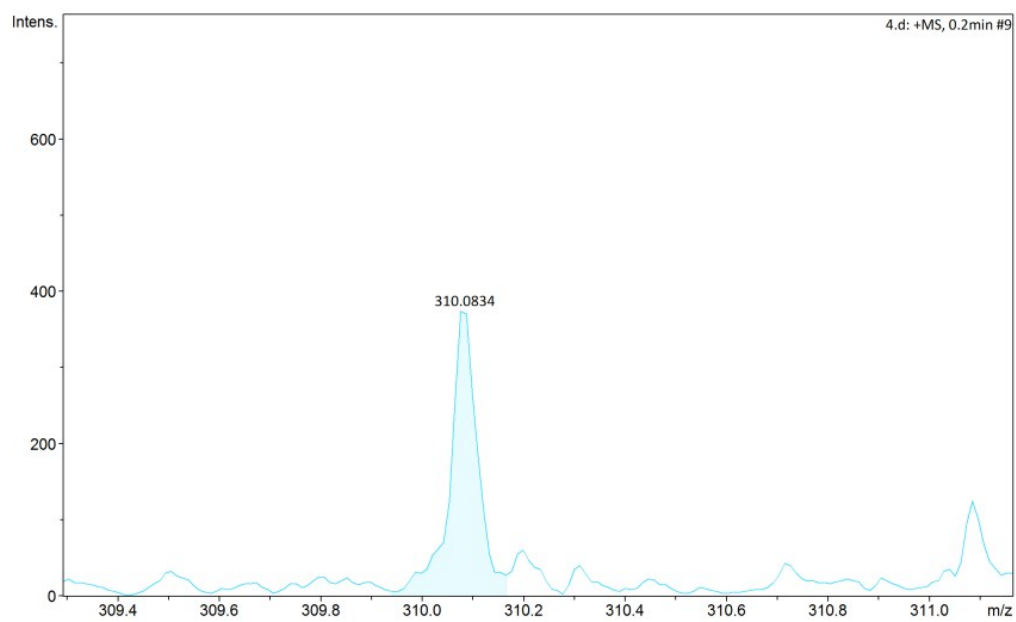

**Fig. S28** High-resolution Mass of BPMA-OM.

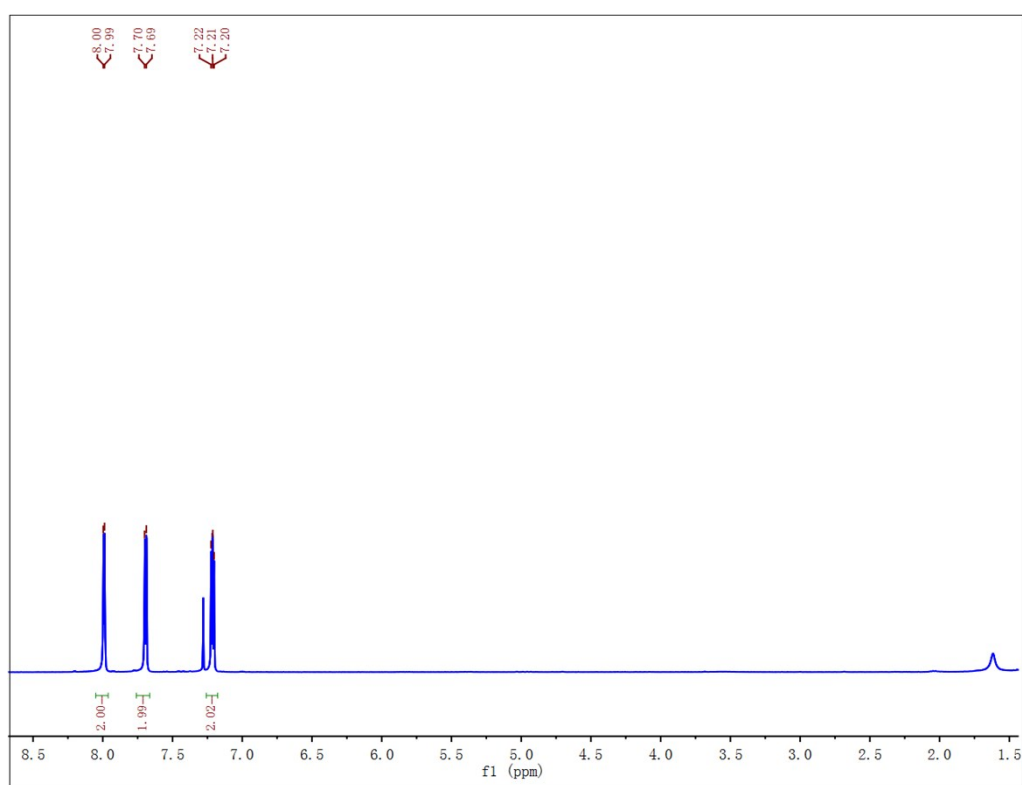

**Fig. S29**  $^1\text{H}$  NMR of BTMA in  $d\text{-CDCl}_3$ .

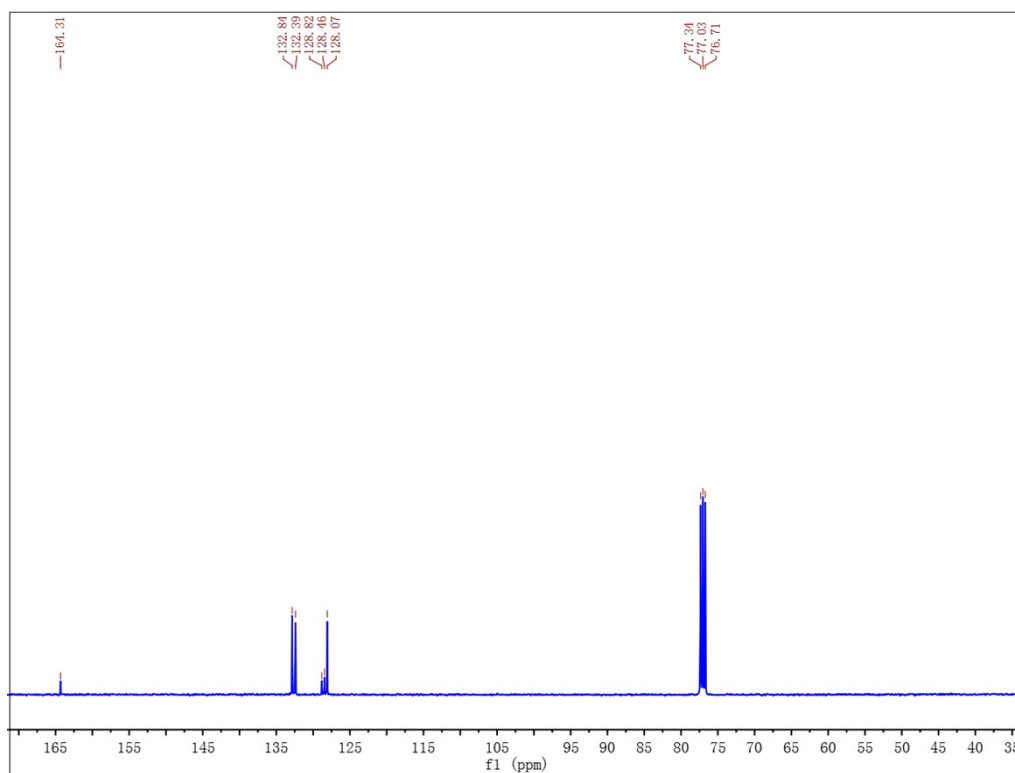

**Fig. S30** <sup>13</sup>C NMR of BTMA in *d*-CDCl<sub>3</sub>.

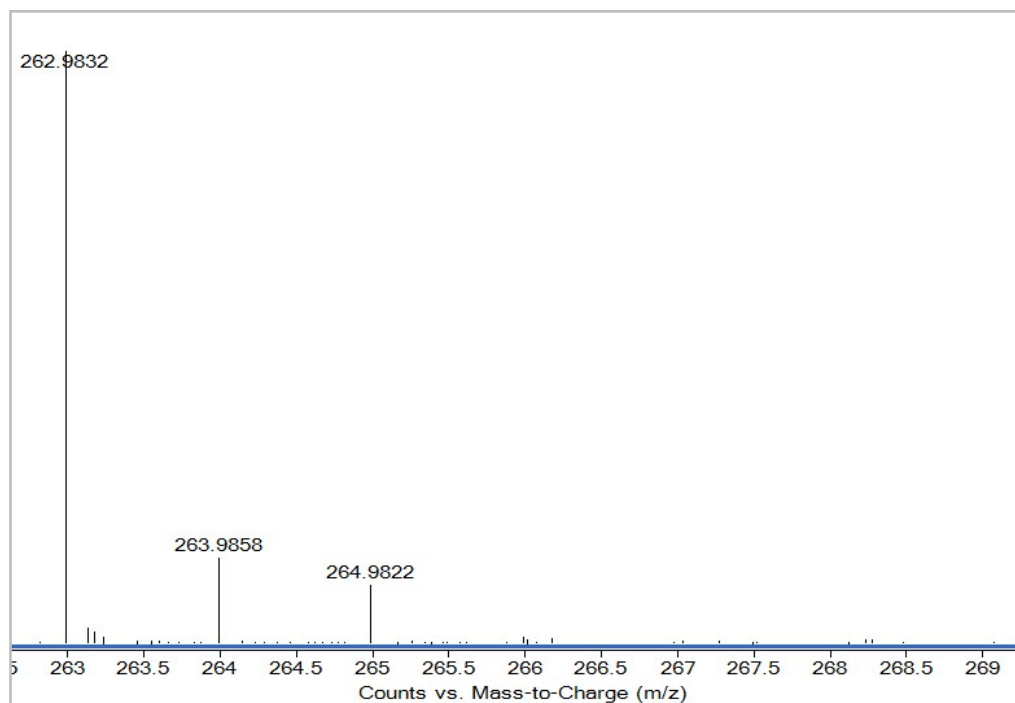

**Fig. S31** High-resolution Mass of BTMA.

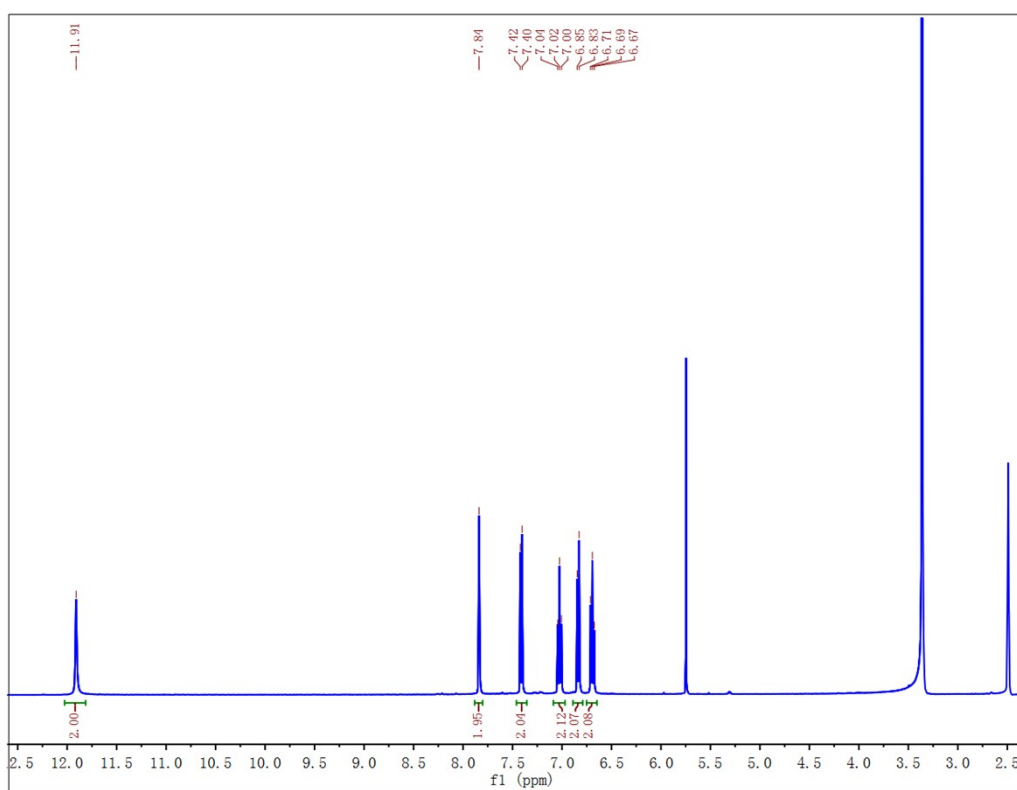

**Fig. S32** <sup>1</sup>H NMR of BIMA in *d*-DMSO.

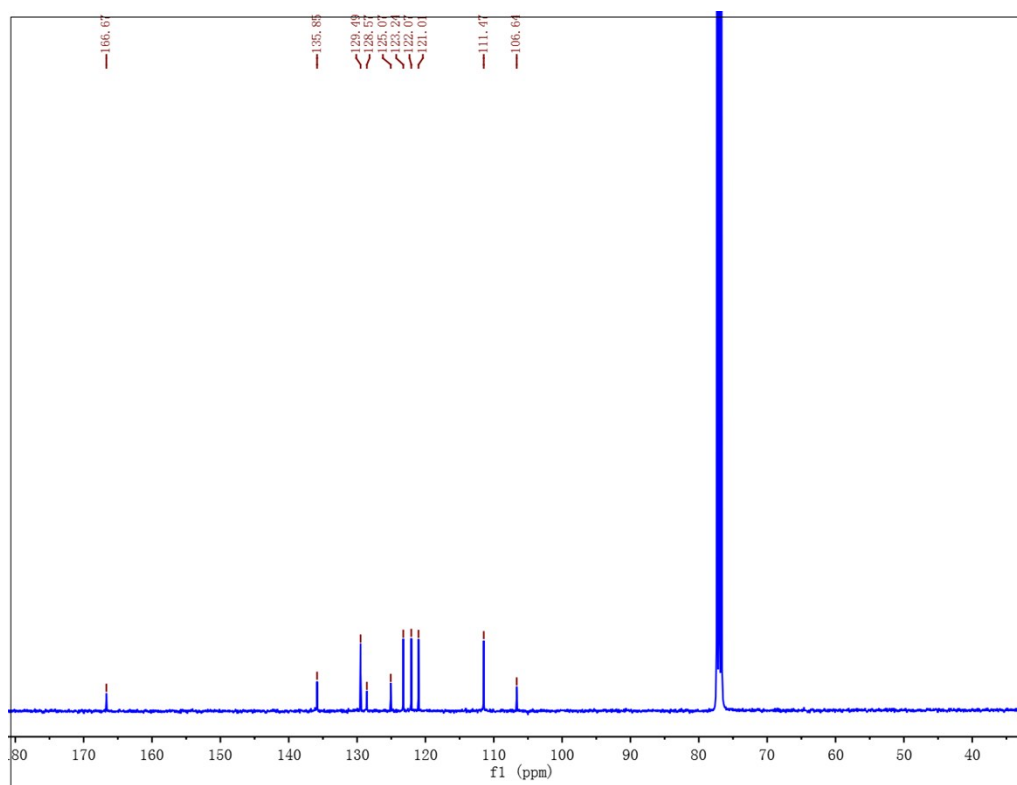

**Fig. S33** <sup>13</sup>C NMR of BIMA in *d*-CDCl<sub>3</sub>.

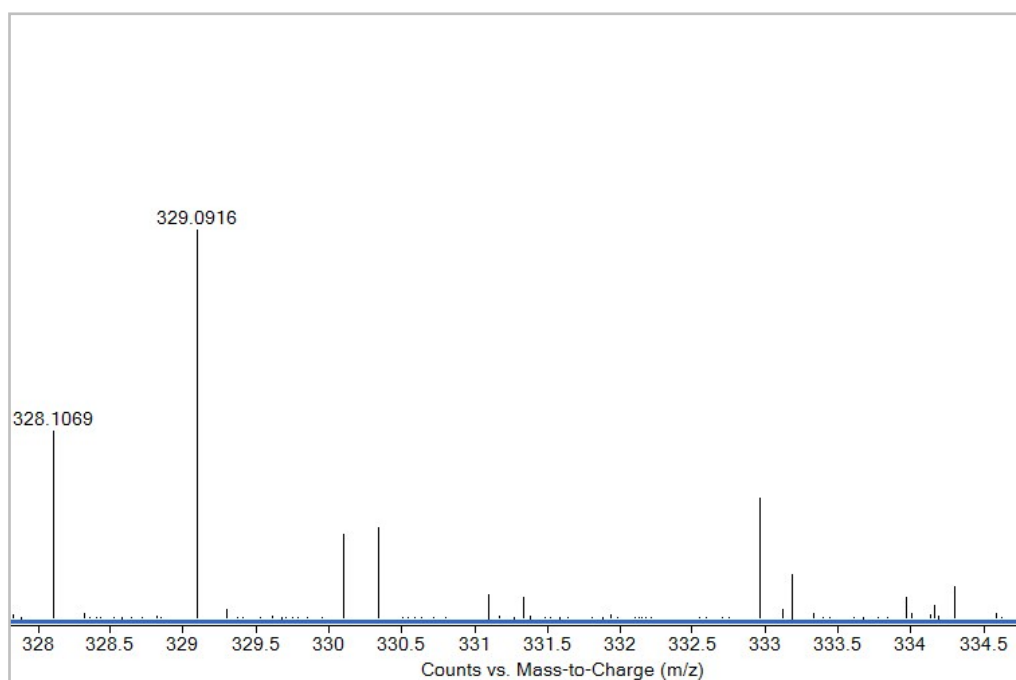

**Fig. S34** High-resolution Mass of BIMA.

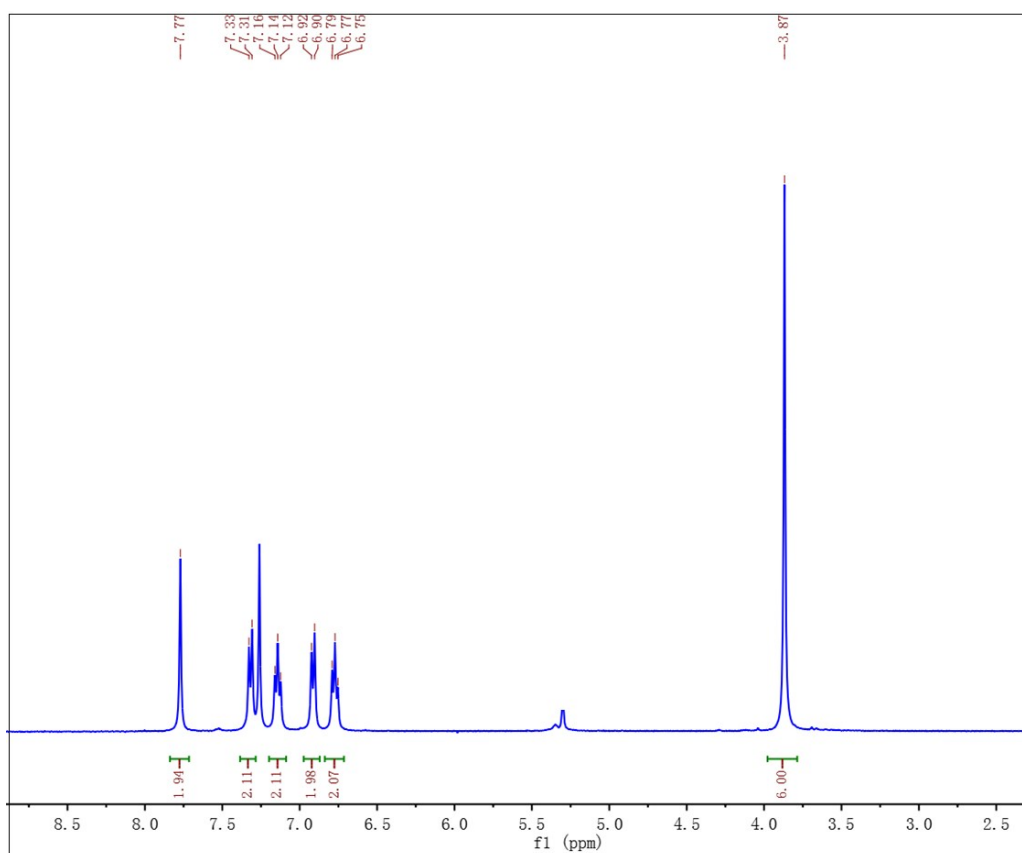

**Fig. S35** <sup>1</sup>H NMR of BIMA-M in *d*-CDCl<sub>3</sub>.



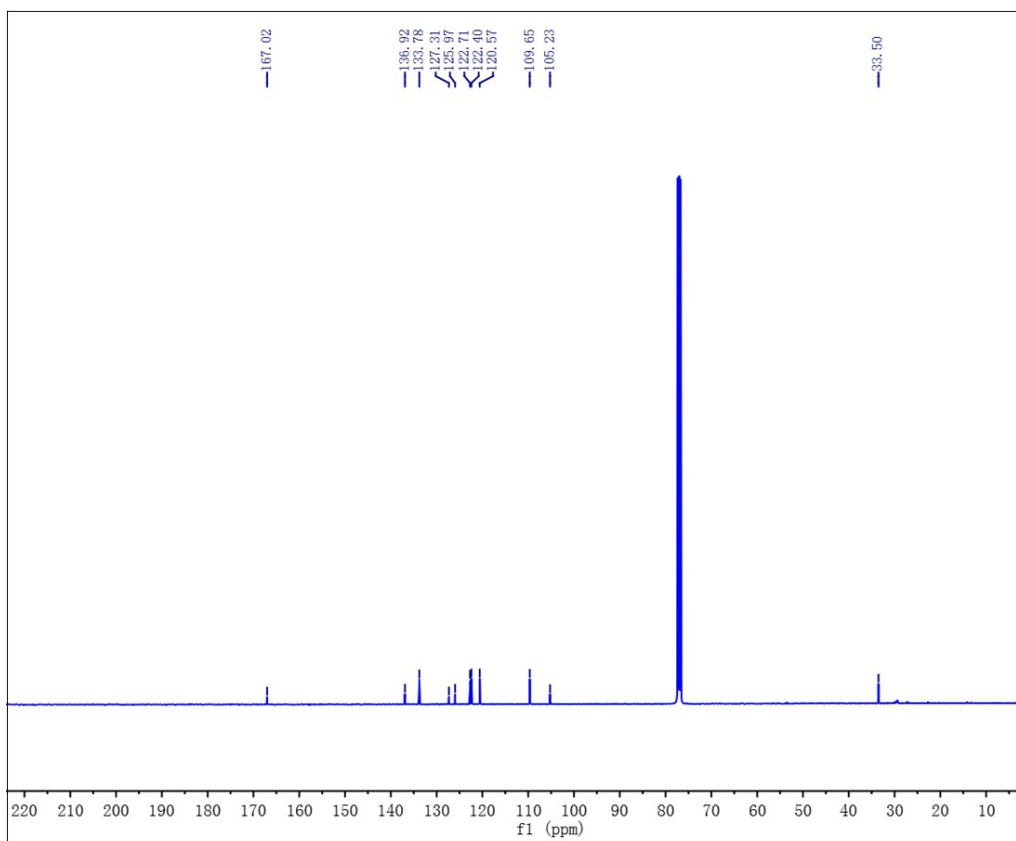

**Fig. S36** <sup>13</sup>C NMR of BIMA-M in *d*-CDCl<sub>3</sub>.

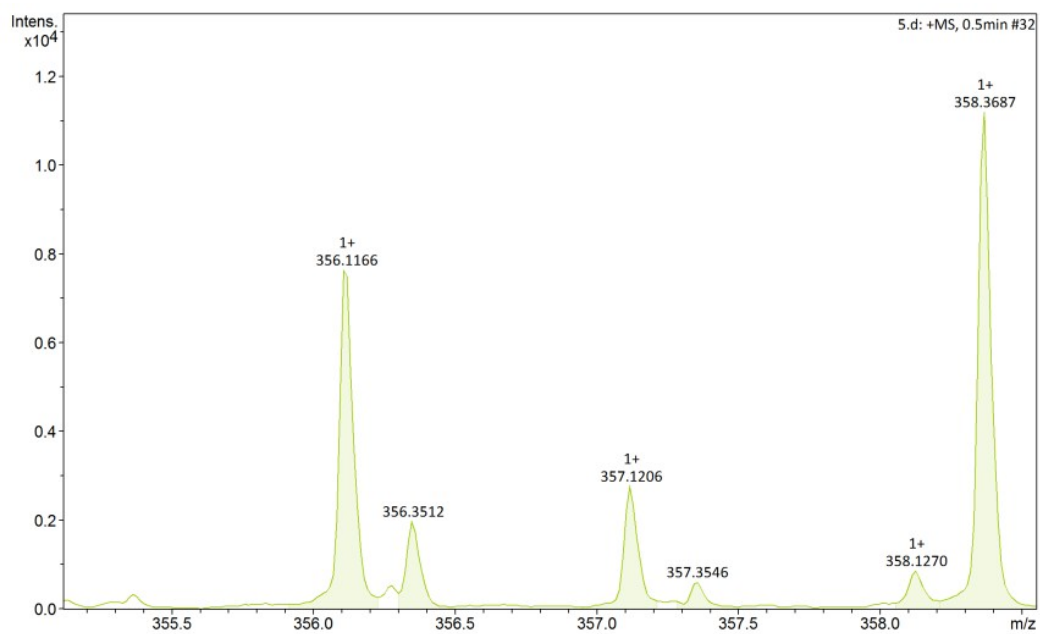

**Fig. S37** High-resolution Mass of BIMA-M.

#### 4. References

- 1 W. H. Melhuish, *J. Phys. Chem.* 1961, **65**, 229-235.
- 2 M. J. Frisch, G. W. Trucks, H. B. Schlegel, G. E. Scuseria, M. A. Robb, J. R. Cheeseman, J. A. Montgomery, Jr., T. Vreven, K. N. Kudin, J. C. Burant, J. M. Millam, S. S. Iyengar, J. Tomasi, V. Barone, B. Mennucci, M. Cossi, G. Scalmani, N. Rega, G. A. Petersson, H. Nakatsuji, M. Hada, M. Ehara, K. Toyota, R. Fukuda, J. Hasegawa, M. Ishida, T. Nakajima, Y. Honda, O. Kitao, H. Nakai, M. Klene, X. Li, J. E. Knox, H. P. Hratchian, J. B. Cross, V. Bakken, C. Adamo, J. Jaramillo, R. Gomperts, R. E. Stratmann, O. Yazyev, A. J. Austin, R. Cammi, C. Pomelli, J. Ochterski, P. Y. Ayala, K. Morokuma, G. A. Voth, P. Salvador, J. J. Dannenberg, V. G. Zakrzewski, S. Dapprich, A. D. Daniels, M. C. Strain, O. Farkas, D. K. Malick, A. D. Rabuck, K. Raghavachari, J. B. Foresman, J. V. Ortiz, Q. Cui, A. G. Baboul, S. Clifford, J. Cioslowski, B. B. Stefanov, G. Liu, A. Liashenko, P. Piskorz, I. Komaromi, R. L. Martin, D. J. Fox, T. Keith, M. A. Al-Laham, C. Y. Peng, A. Nanayakkara, M. Challacombe, P. M. W. Gill, B. G. Johnson, W. Chen, M. W. Wong, C. Gonzalez and J. A. Pople, GAUSSIAN 09 (Revision B.01), Gaussian, Inc., Wallingford, CT, 2004.
- 3 X. Li, J. Chen, D. Ma, Q. Zhang, H. Tian, *Proc. of SPIE*, 2005, **5632**, 357-364.
